# Supplementary material for: In situ generation of active species “NO” for the aerobic oxidative deprotection of aldoximes catalyzed by FeCl3/TEMPO
Source: Royal Society of Chemistry journal article supplement (doi:10.1039/c3ra45205k), 2013-01-01

## [Supporting Information]

### **In-Situ Generation of Active Species “NO” for the Aerobic Oxidative deprotection of aldoximes Catalyzed by FeCl<sub>3</sub>/TEMPO**

*Guofu Zhang, Xin Wen, Yong Wang, Xingwang Han, Yuxin Luan, Lebin Zheng,  
Chengrong Ding\* and Xiaoji Cao\**

*College of Chemical Engineering and Materials Science, Zhejiang University of  
Technology, Hangzhou 310014, People’s Republic of China*

*dingcr2004@yahoo.com.cn, xiaojicao@zjut.edu.cn*

### **Table of Contents**

*General Experimental.....page S2*

*Experimental Sections.....page S3-S6*

*Characterization Data for Products.....page S7-S9*

*<sup>1</sup>HNMR spectra for Products.....page S10-S26*

## General Experimental

Reagents were purchased at commercial quality and used without further purification. Oximes were prepared using literature procedures.<sup>[1,2]</sup> Yields referred to isolated yields purified by column chromatography on silica gel (300-400 mesh) with hexane and ethyl acetate (10:1) to give the corresponding carbonyl compounds. <sup>1</sup>H NMR spectra were recorded on Bruker AVANCE III 500MHz instrument with TMS as internal standard. Coupling constants were reported in Hertz (Hz).

## Experimental Sections

### *General Procedure for Preparation of Oximes*

A mixture of aldehyde (50.0 mmol),  $\text{NH}_2\text{OH}\cdot\text{HCl}$  (74.0 mol, 5.13 g),  $\text{CH}_3\text{COONa}$  (125.0 mmol, 10.26 g), ethyl alcohol (10.0 mL) and water (40.0 mL) were placed in a 100 mL round-bottomed flask with a reflux condenser. Then the mixture was stirred under reflux, the progress was monitored by TLC. After the reaction, the contents were poured into a 250 mL beaker. After cooling, the precipitate was filtered with suction, thoroughly washed with water and dried under vacuum, then recrystallization with ethyl alcohol to obtain a pure solid.

**4-Bromobenzaldehyde oxime** (white solid, 93% yield):  $^1\text{H}$  NMR (500 MHz,  $\text{CDCl}_3$ ):  $\delta$  7.46(q, 2H), 7.54(q, 2H), 7.83(s, 1H), 8.11(s, 1H).

**4-Nitrobenzaldehyde oxime** (light yellow solid, 93% yield):  $^1\text{H}$  NMR (500 MHz,  $\text{CDCl}_3$ ):  $\delta$  7.76-7.78(q, 2H), 8.22(s, 1H), 8.25-8.28(q, 2H).

**4-(Trifluoromethyl)benzaldehyde oxime** (white solid, 91% yield):  $^1\text{H}$  NMR (500 MHz,  $\text{DMSO-d}^6$ ):  $\delta$  7.77(d,  $J = 8.5$  Hz, 2H), 7.82(d,  $J = 8.5$  Hz, 2H), 8.26(s, 1H), 11.62(s, 1H).

**4-Chlorobenzaldehyde oxime** (white solid, 95% yield):  $^1\text{H}$  NMR (500 MHz,  $\text{DMSO-d}^6$ ):  $\delta$  7.45-7.48(m, 2H), 7.60-7.63(q, 2H), 8.16(s, 1H), 11.38(s, 1H).

**3-(Trifluoromethyl)benzaldehyde oxime** (white solid, 91% yield):  $^1\text{H}$  NMR (500 MHz,  $\text{DMSO-d}^6$ ):  $\delta$  7.58-7.62(q, 1H), 7.68(d,  $J = 7.5$  Hz, 1H),

7.89(d,  $J = 8.0$  Hz, 2H), 8.27(s, 1H), 11.55(s, 1H).

**3-Nitrobenzaldehyde oxime** (light yellow solid, 93% yield):  $^1\text{H}$  NMR (500 MHz, DMSO- $d^6$ ):  $\delta$  7.71(t,  $J = 8.2$  Hz, 1H), 8.05-8.06(m, 1H), 8.21-8.24(m, 1H), 8.34 (s, 1H), 8.42(s, 1H), 11.66(s, 1H).

**2-Chlorobenzaldehyde oxime** (white solid, 90% yield):  $^1\text{H}$  NMR (500 MHz, DMSO- $d^6$ ):  $\delta$  7.42-7.44(q, 2H), 7.56-7.58(m, 1H), 7.63(s, 1H), 8.15(s, 1H), 11.44(s, 1H).

**2-Nitrobenzaldehyde oxime** (light yellow solid, 93% yield):  $^1\text{H}$  NMR (500 MHz, DMSO- $d^6$ ):  $\delta$  7.64-7.67(m, 1H), 7.75-7.79(m, 1H), 7.88-7.90(m, 1H), 8.03-8.05(m, 1H), 8.41(s, 1H), 11.78(s, 1H).

**2-Bromobenzaldehyde oxime** (white solid, 91% yield):  $^1\text{H}$  NMR (500 MHz, DMSO- $d^6$ ):  $\delta$  7.33-7.36(m, 1H), 7.42(t,  $J = 7.5$  Hz, 1H), 7.68(d,  $J = 7.5$  Hz, 1H), 7.79-7.81(q, 1H), 8.32(s, 1H), 11.70(s, 1H).

**2,4-Dichlorobenzaldehyde oxime** (white solid, 95% yield):  $^1\text{H}$  NMR (500 MHz, DMSO- $d^6$ ):  $\delta$  7.46-7.48(q, 1H), 7.70(s, 1H), 7.82(d,  $J = 8.5$  Hz, 1H), 8.32(s, 1H), 11.81(s, 1H).

**2-Chloro-6-fluoro-benzaldehyde oxime** (white solid, 92% yield):  $^1\text{H}$  NMR (500 MHz, DMSO- $d^6$ ):  $\delta$  7.31-7.34(m, 1H), 7.41( $J = 8.0$  Hz, 1H), 7.44-7.49(m, 1H), 8.24(s, 1H), 11.87(s, 1H).

**4-iso-Propylbenzaldehyde oxime** (white solid, 89% yield):  $^1\text{H}$  NMR (500 MHz, DMSO- $d^6$ ):  $\delta$  1.20-1.22(q, 6H), 2.87-2.92(m, 1H), 7.27(d,  $J = 8.2$  Hz, 2H), 7.51(d,  $J = 8.2$  Hz, 2H), 8.10(s, 1H), 11.11(s, 1H)

**4-*tert*-Butylbenzaldehyde oxime** (white solid, 92% yield):  $^1\text{H}$  NMR (500 MHz, DMSO- $d^6$ ):  $\delta$  1.29(s, 9H), 7.42-7.43(q, 2H), 7.51-7.53(q, 2H), 8.10(s, 1H), 11.12(s, 1H).

**4-Methylbenzaldehyde oxime** (white solid, 92% yield):  $^1\text{H}$  NMR (500 MHz, DMSO- $d^6$ ):  $\delta$  2.32(s, 3H), 7.21(d,  $J = 8.0$  Hz, 1H), 7.48(d,  $J = 8.0$  Hz, 1H), 8.09(s, 1H), 11.10(s, 1H).

**3,4-Dimethylbenzaldehyde oxime** (white solid, 93% yield):  $^1\text{H}$  NMR (500 MHz, DMSO- $d^6$ ):  $\delta$  2.23(s, 6H), 7.16(d,  $J = 7.8$  Hz, 1H), 7.30(t,  $J = 4.6$  Hz, 1H), 7.36(s, 1H), 8.05(s, 1H), 11.06(s, 1H).

**4-Chloroacetophenone oxime** (white solid, 93% yield):  $^1\text{H}$  NMR (500 MHz,  $\text{CDCl}_3$ ):  $\delta$  2.29(s, 3H), 7.37(d,  $J = 10.0$  Hz, 2H), 7.58(d,  $J = 10.0$  Hz, 2H), 8.30 (s, 1H).

**Acetophenone oxime** (white solid, 94% yield):  $^1\text{H}$  NMR (500 MHz,  $\text{CDCl}_3$ ):  $\delta$  2.33(s, 3H), 7.40-7.41(q, 3H), 7.64-7.66(q, 2H), 8.83 (s, 1H).

## References

- (1) A. Lachman, C. R. Noller, *Org. Synth.* **1943**, *2*, 70.
- (2) J. S. Buck, W. S. Ide, J. R. Johnson, E. Amstutz, *Org. Synth.* **1943**, *2*, 622.

### ***General Experimental Procedure for Deoxygenation to the Corresponding Carbonyl Compounds***

Oxime (1.0 mmol), TEMPO (0.1 mmol, 0.0156 g), FeCl<sub>3</sub> (0.1 mmol, 0.0162 g) were introduced into a 50 ml round bottom flask equipped with a magnetic stirrer and the flask was purged several times with oxygen (balloon filled), and the system was immediately sealed. Then the solvent (PhCH<sub>3</sub>/H<sub>2</sub>O 3/1, 4.0 mL) was injected into the flask and the reaction mixture was stirred at 60 °C for several hours. After the reaction, the mixture was cooled to room temperature and extracted with CH<sub>2</sub>Cl<sub>2</sub>. The combined organic phase was washed with aqueous Na<sub>2</sub>S<sub>2</sub>O<sub>3</sub> to remove the residual oxidants. The organic layer was dried over anhydrous Na<sub>2</sub>SO<sub>4</sub> and then the solvent was removed under reduced pressure. The residue was further purified by column chromatography on silica gel (300-400 mesh) with hexane and ethyl acetate (10:1) to give the corresponding carbonyl compounds.

## Characterization Data for Products

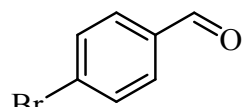

**4-Bromobenzaldehyde (Table 2, entry 1):**  $^1\text{H}$  NMR (500 MHz,  $\text{CDCl}_3$ ):  $\delta$  7.70-7.71(q, 2H), 7.75-7.80(m, 2H), 10.00(s, 1H).

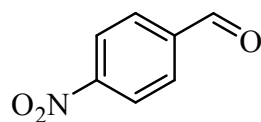

**4-Nitrobenzaldehyde (Table 2, entry 2):**  $^1\text{H}$  NMR (500 MHz,  $\text{CDCl}_3$ ):  $\delta$  8.08-8.10(q, 2H), 8.41(d,  $J = 8.5$  Hz, 2H), 10.18(s, 1H).

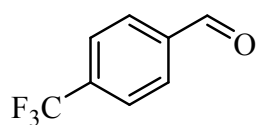

**4-(Trifluoromethyl)benzaldehyde (Table 2, entry 3):**  $^1\text{H}$  NMR (500 MHz,  $\text{CDCl}_3$ ):  $\delta$  7.82(d,  $J = 8.0$  Hz, 2H), 8.02(d,  $J = 7.5$  Hz, 2H), 10.12(s, 1H).

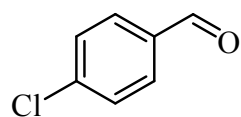

**4-Chlorobenzaldehyde (Table 2, entry 4):**  $^1\text{H}$  NMR (500 MHz,  $\text{CDCl}_3$ ):  $\delta$  7.53-7.55(m, 2H), 7.83-7.86(m, 2H), 10.00(s, 1H).

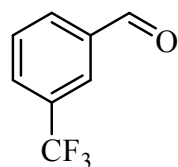

**3-(Trifluoromethyl)benzaldehyde (Table 2, entry 5):**  $^1\text{H}$  NMR (500 MHz,  $\text{CDCl}_3$ ):  $\delta$  7.70(t,  $J = 8.0$  Hz, 1H), 7.90(d,  $J = 8.0$  Hz, 1H), 8.09(d,  $J = 8.0$  Hz, 1H), 8.15(s, 1H), 10.90(s, 1H).

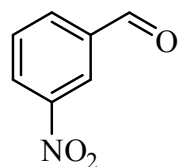

**3-Nitrobenzaldehyde (Table 2, entry 6):**  $^1\text{H}$  NMR (500 MHz,  $\text{CDCl}_3$ ):  $\delta$  7.78(t,  $J = 7.8$  Hz, 1H), 8.24-8.26(q, 1H), 8.50-8.53(m, 1H), 8.74(s, 1H), 10.15(s, 1H).

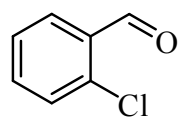

**2-Chlorobenzaldehyde (Table 2, entry 7):**  $^1\text{H}$  NMR (500 MHz,  $\text{CDCl}_3$ ):  $\delta$  7.50(t,  $J = 8.0$  Hz, 1H), 7.60-7.62(m, 1H), 7.77-7.79(m, 1H), 7.87(s, 1H), 10.00(s, 1H).

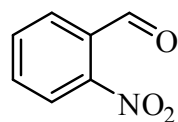

**2-Nitrobenzaldehyde (Table 2, entry 8):**  $^1\text{H}$  NMR (500 MHz,  $\text{CDCl}_3$ ):  $\delta$

7.76-7.83(m, 2H), 7.97-7.99(q, 1H), 8.13-8.15(q, 1H), 10.46(s, 1H).

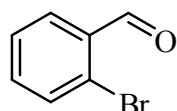

**2-Bromobenzaldehyde (Table 2, entry 9):**  $^1\text{H NMR}$  (500 MHz,  $\text{CDCl}_3$ ):  $\delta$  7.44-7.46(m, 2H), 7.65-7.67(m, 1H), 7.91-7.93(m, 1H), 10.37(s, 1H).

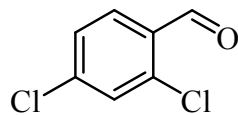

**2,4-Dichlorobenzaldehyde (Table 2, entry 10):**  $^1\text{H NMR}$  (500 MHz,  $\text{CDCl}_3$ ):  $\delta$  7.38-7.40(m, 1H), 7.50(s, 1H), 7.89(d,  $J = 8.5$  Hz, 1H), 10.42(s, 1H).

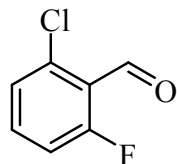

**2-Chloro-6-fluoro-benzaldehyde (Table 2, entry 11):**  $^1\text{H NMR}$  (500 MHz,  $\text{CDCl}_3$ ):  $\delta$  7.10-7.14(t,  $J = 9.0$  Hz, 1H), 7.30(d,  $J = 7.5$  Hz, 1H), 7.48-7.52(m, 1H), 10.48(s, 1H).

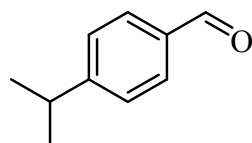

**4-iso-Propylbenzaldehyde (Table 2, entry 12):**  $^1\text{H NMR}$  (500 MHz,  $\text{CDCl}_3$ ):  $\delta$  1.30(d,  $J = 7.0$  Hz, 6H), 2.98-3.03(m, 1H), 7.40(d,  $J = 8.5$  Hz, 2H), 7.83(d,  $J = 8.5$  Hz, 2H), 10.00(s, 1H).

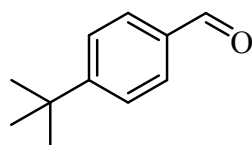

**4-tert-Butylbenzaldehyde (Table 2, entry 13):**  $^1\text{H NMR}$  (500 MHz,  $\text{CDCl}_3$ ):  $\delta$  1.37(s, 9H), 7.57(d,  $J = 8.5$  Hz, 2H), 7.84(d,  $J = 8.0$  Hz, 2H), 10.00(s, 1H).

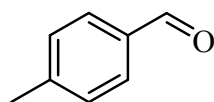

**4-Methylbenzaldehyde (Table 2, entry 14):**  $^1\text{H NMR}$  (500 MHz,  $\text{CDCl}_3$ ):  $\delta$  2.45(s, 3H), 7.34(d,  $J = 8.0$  Hz, 2H), 7.78(d,  $J = 8.0$  Hz, 2H), 9.97(s, 1H).

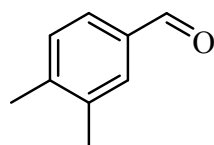

**3,4-Dimethylbenzaldehyde (Table 2, entry 15):**  $^1\text{H NMR}$  (500 MHz,  $\text{CDCl}_3$ ):  $\delta$  2.35(s, 3H), 2.36(s, 3H), 7.30(d,  $J = 8.0$  Hz, 1H), 7.63(d,  $J = 7.5$  Hz, 1H), 7.66(s, 1H), 9.96(s, 1H).

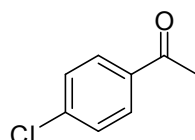

**4-Chloroacetophenone (Table 2, entry 16):** liquid.  $^1\text{H NMR}$  (500 MHz,  $\text{CDCl}_3$ ):  $\delta$  2.61(s, 3H), 7.45(d,  $J = 10.0$  Hz, 2H), 7.91(d,  $J = 10.0$  Hz, 2H).



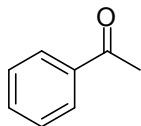

**Acetophenone (Table 2, entry 17):** liquid. <sup>1</sup>H NMR (500 MHz, CDCl<sub>3</sub>): δ  
2.62(s, 3H), 7.47(t, *J* = 7.5 Hz, 2H), 7.58(t, *J* = 7.5 Hz, 1H), 7.97(t, *J* = 5.0 Hz, 2H).

Figure 1.  $^1\text{H}$ NMR spectra of **4-Bromobenzaldehyde** (Table 2, entry 1).

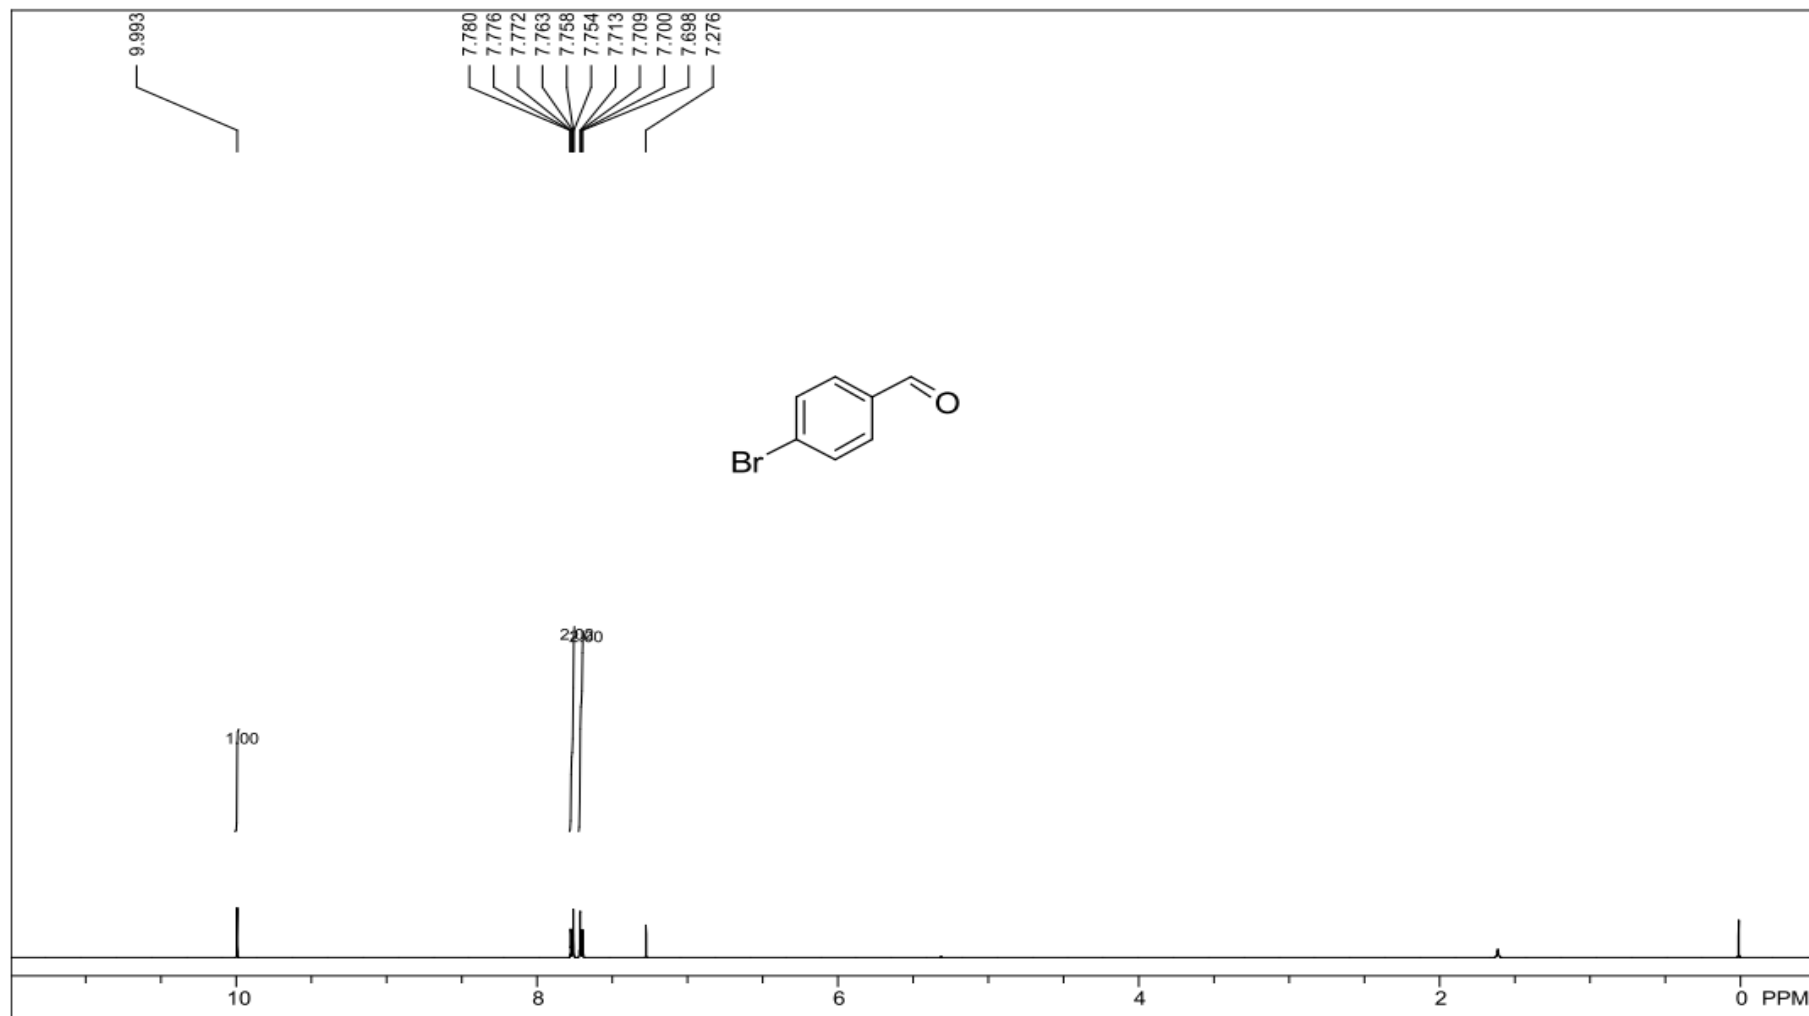

Figure 2. <sup>1</sup>H NMR spectra of **4-Nitrobenzaldehyde** (Table 2, entry 2).

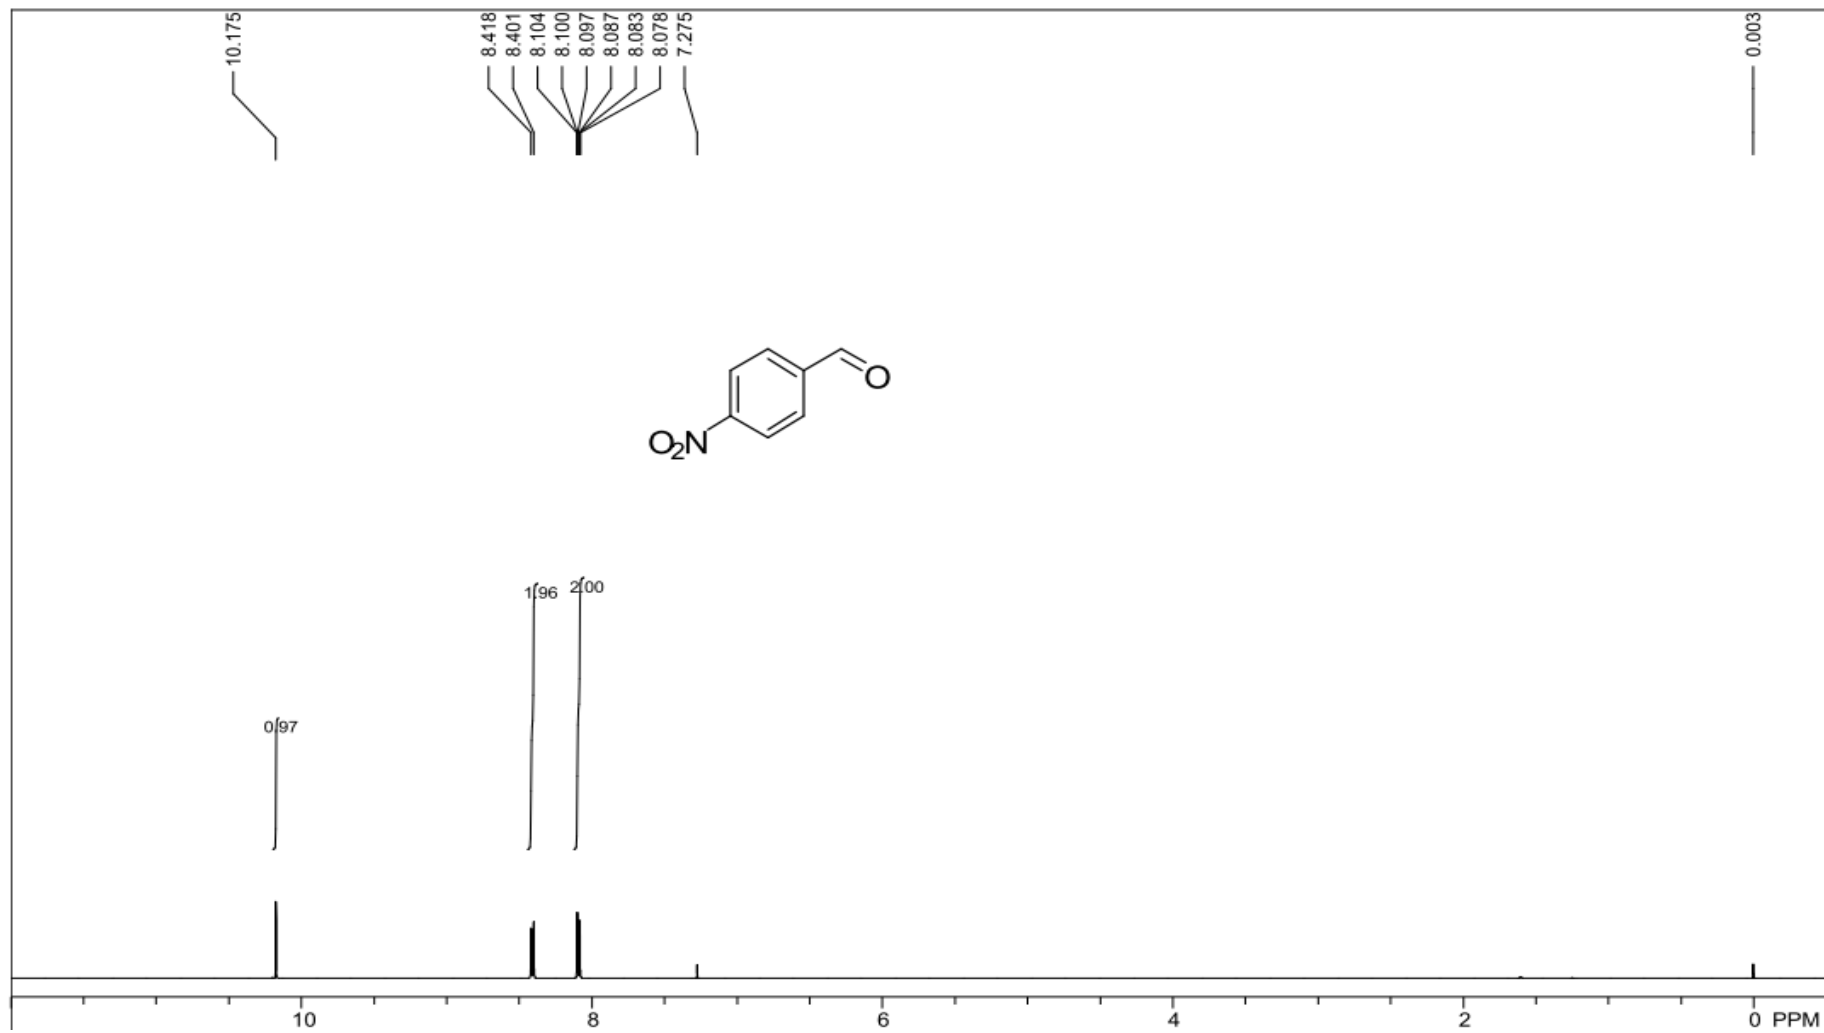

Figure 3. <sup>1</sup>H NMR spectra of 4-(Trifluoromethyl)benzaldehyde (Table 2, entry 3).

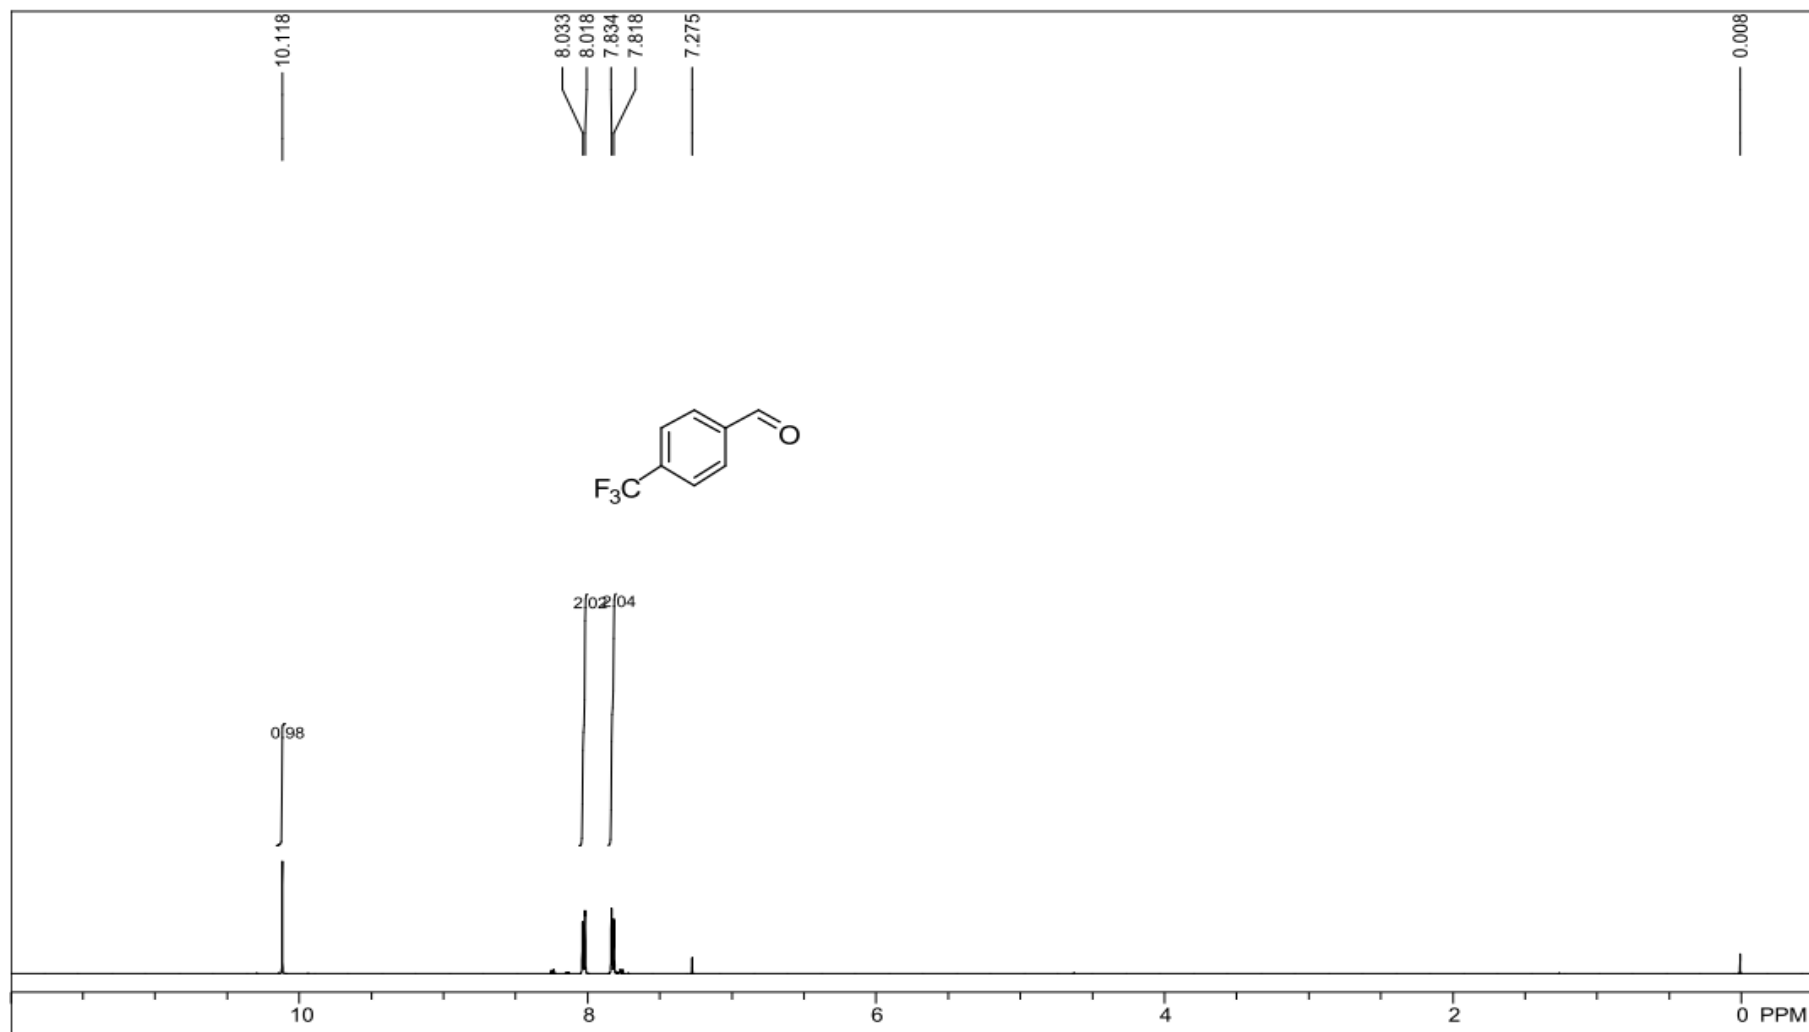

Figure 4. <sup>1</sup>H NMR of 4-Chlorobenzaldehyde (Table 2, entry 4).

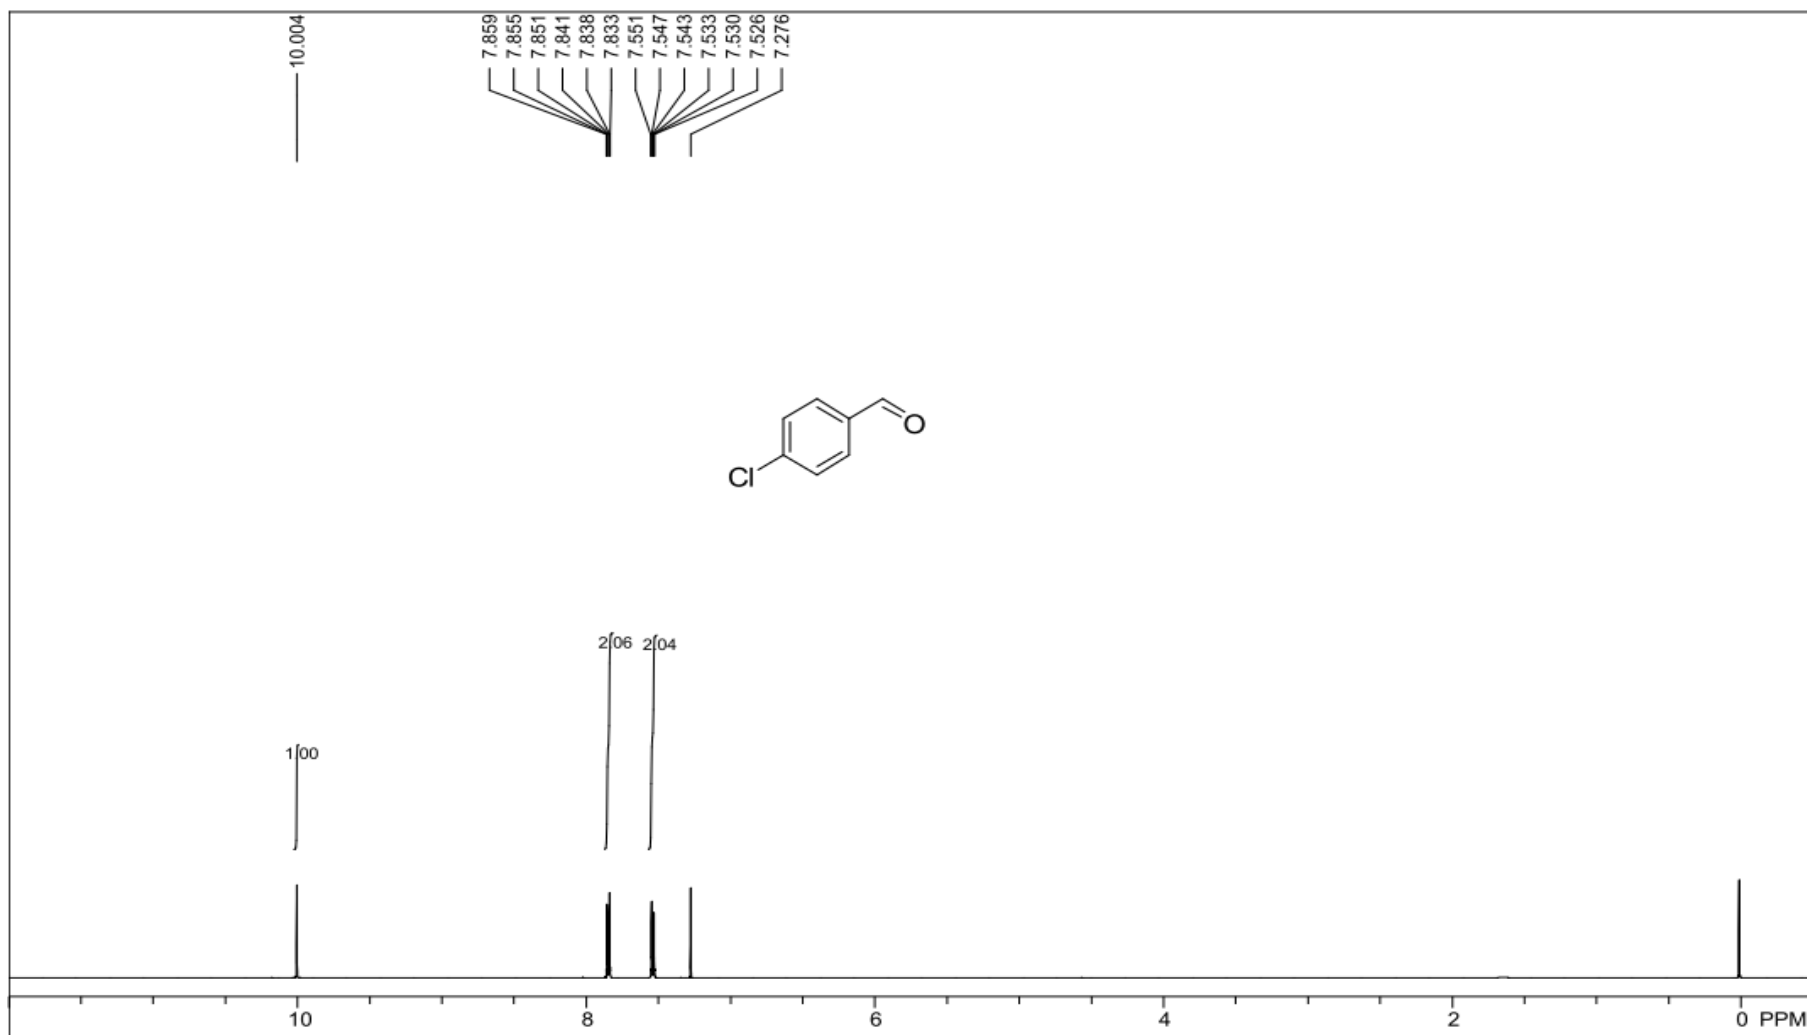

Figure 5. <sup>1</sup>H NMR spectra of **3-(Trifluoromethyl)benzaldehyde** (Table 2, entry 5).

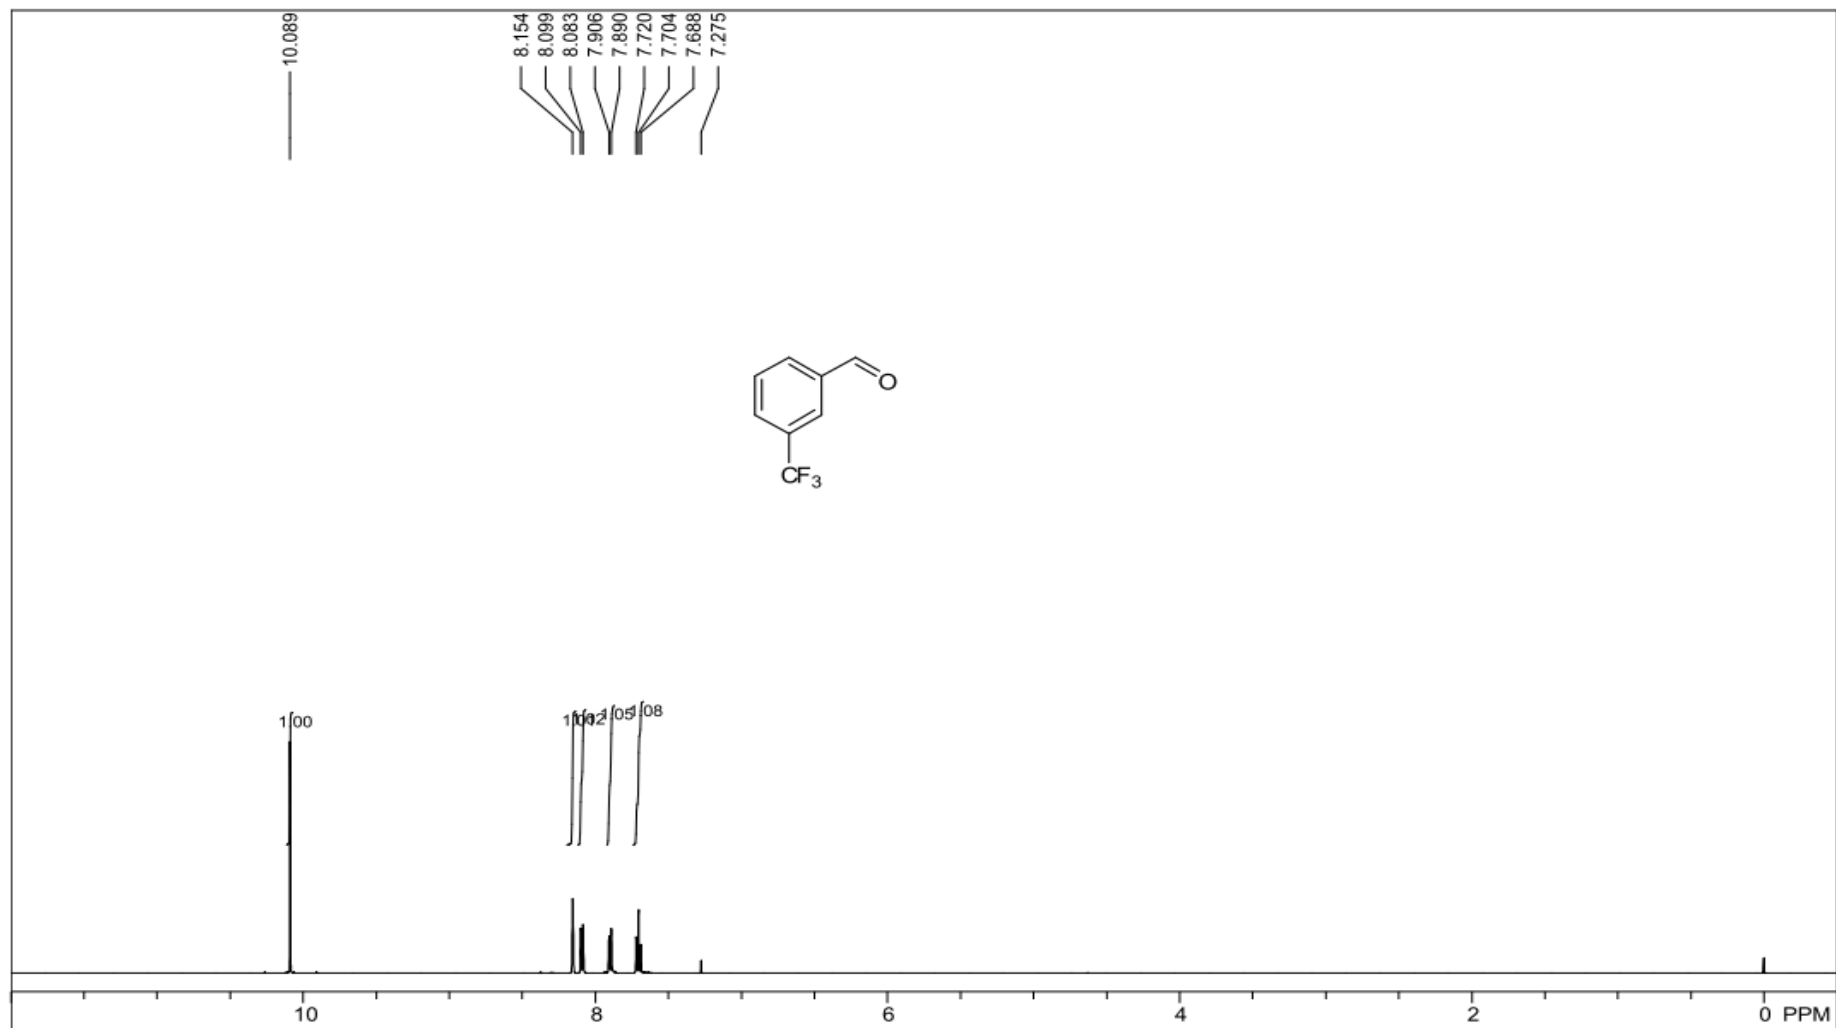

Figure 6. <sup>1</sup>HNMR spectra of **3-Nitrobenzaldehyde** (Table 2, entry 6).

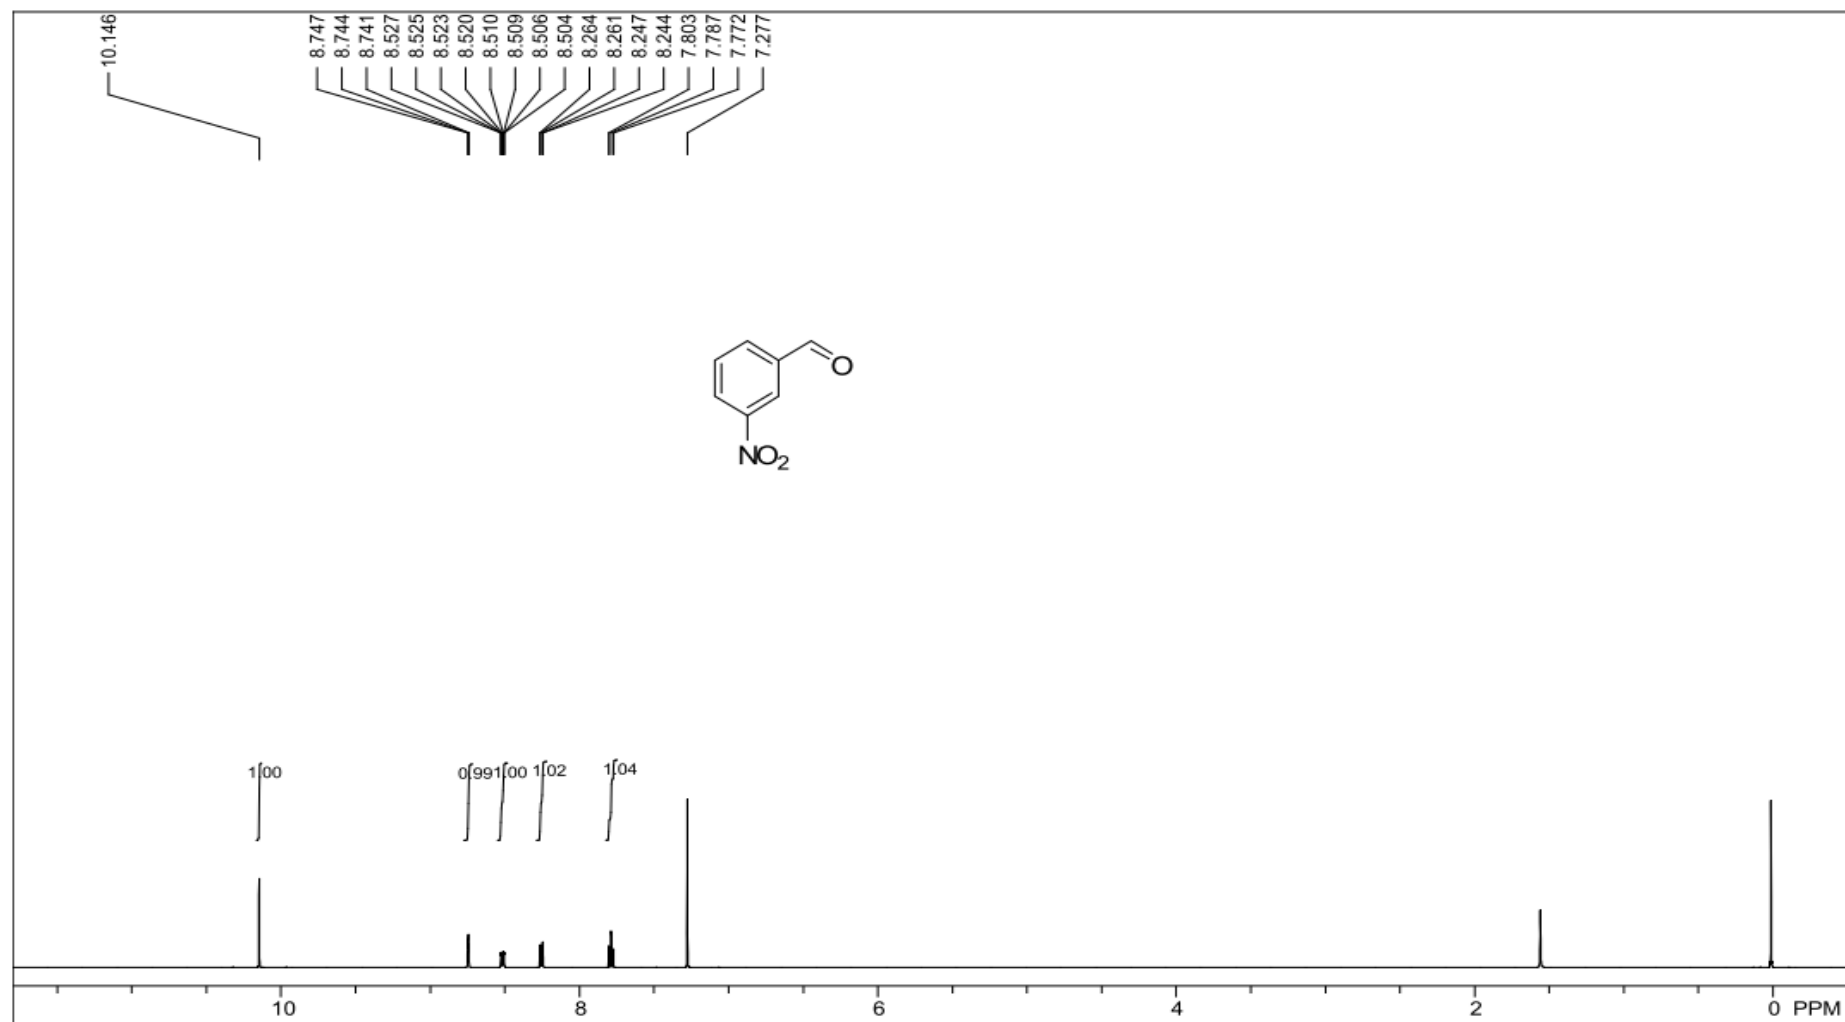

Figure 7. <sup>1</sup>HNMR spectra of **2-Chlorobenzaldehyde** (Table 2, entry 7).

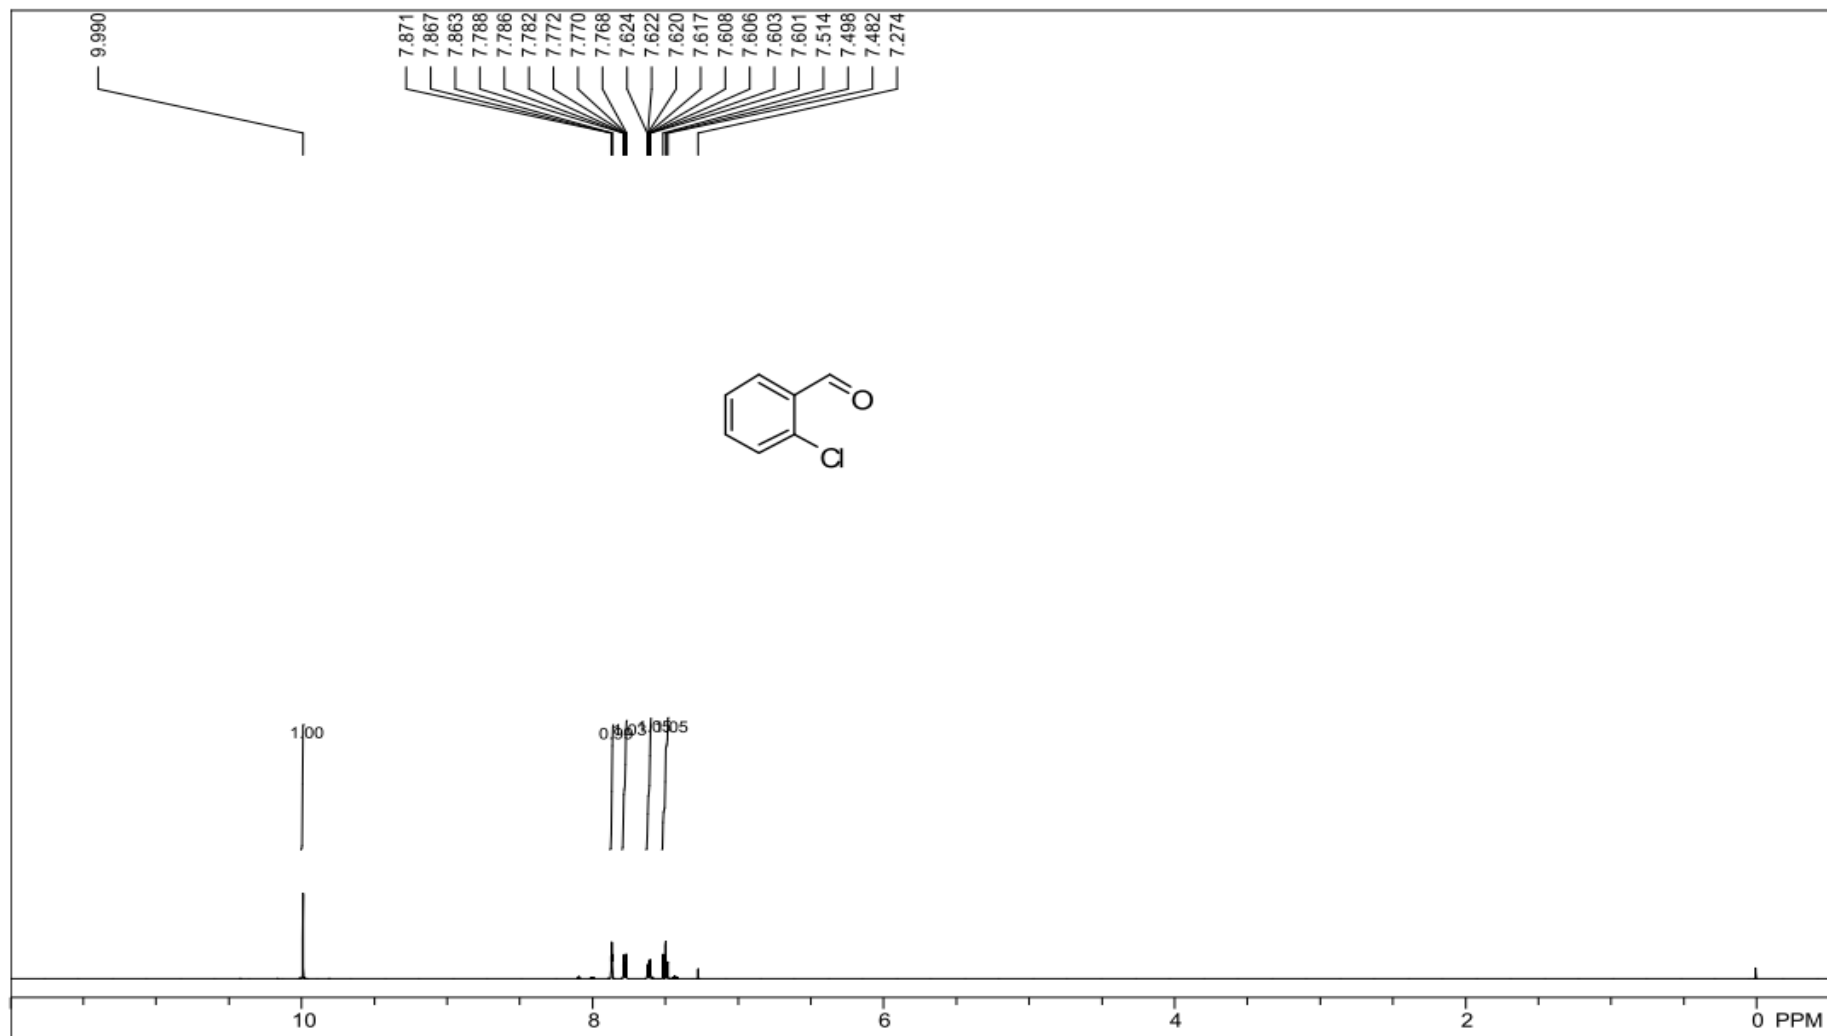



Figure 8. <sup>1</sup>HNMR of 2-Nitrobenzaldehyde (Table 2, entry 8).

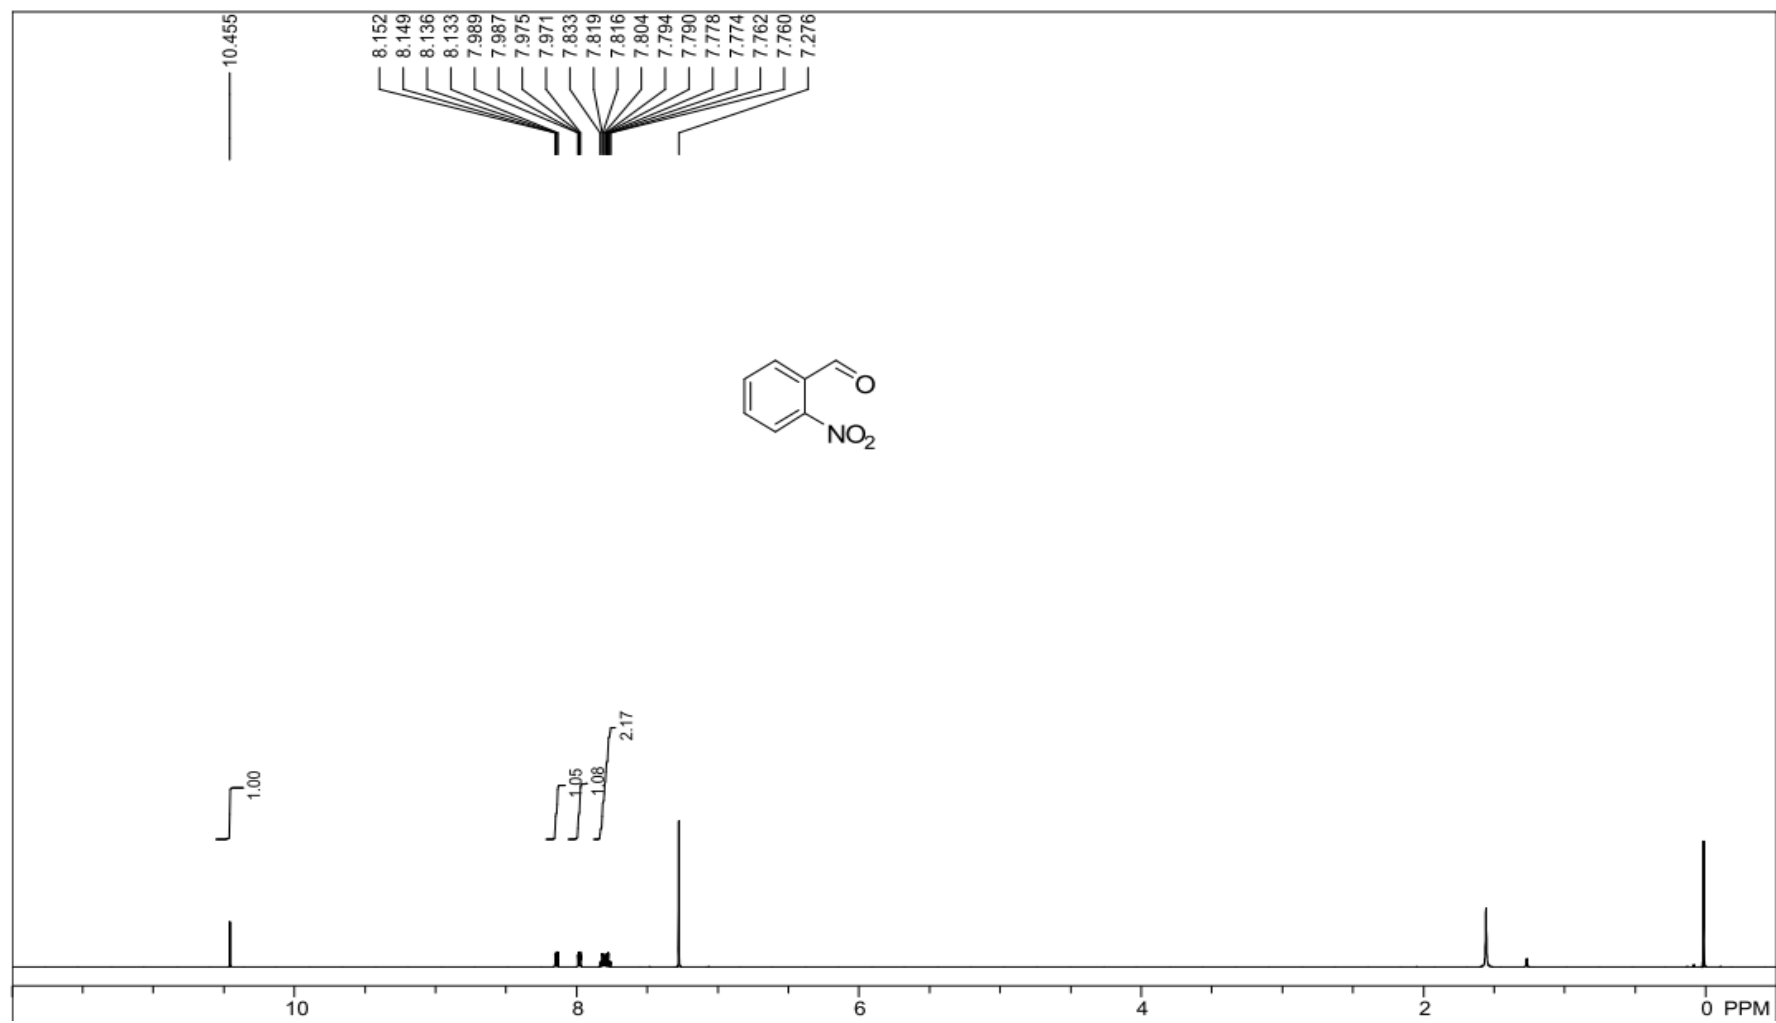

Figure 9. <sup>1</sup>H NMR spectra of **2-Bromobenzaldehyde** (Table 2, entry 9).

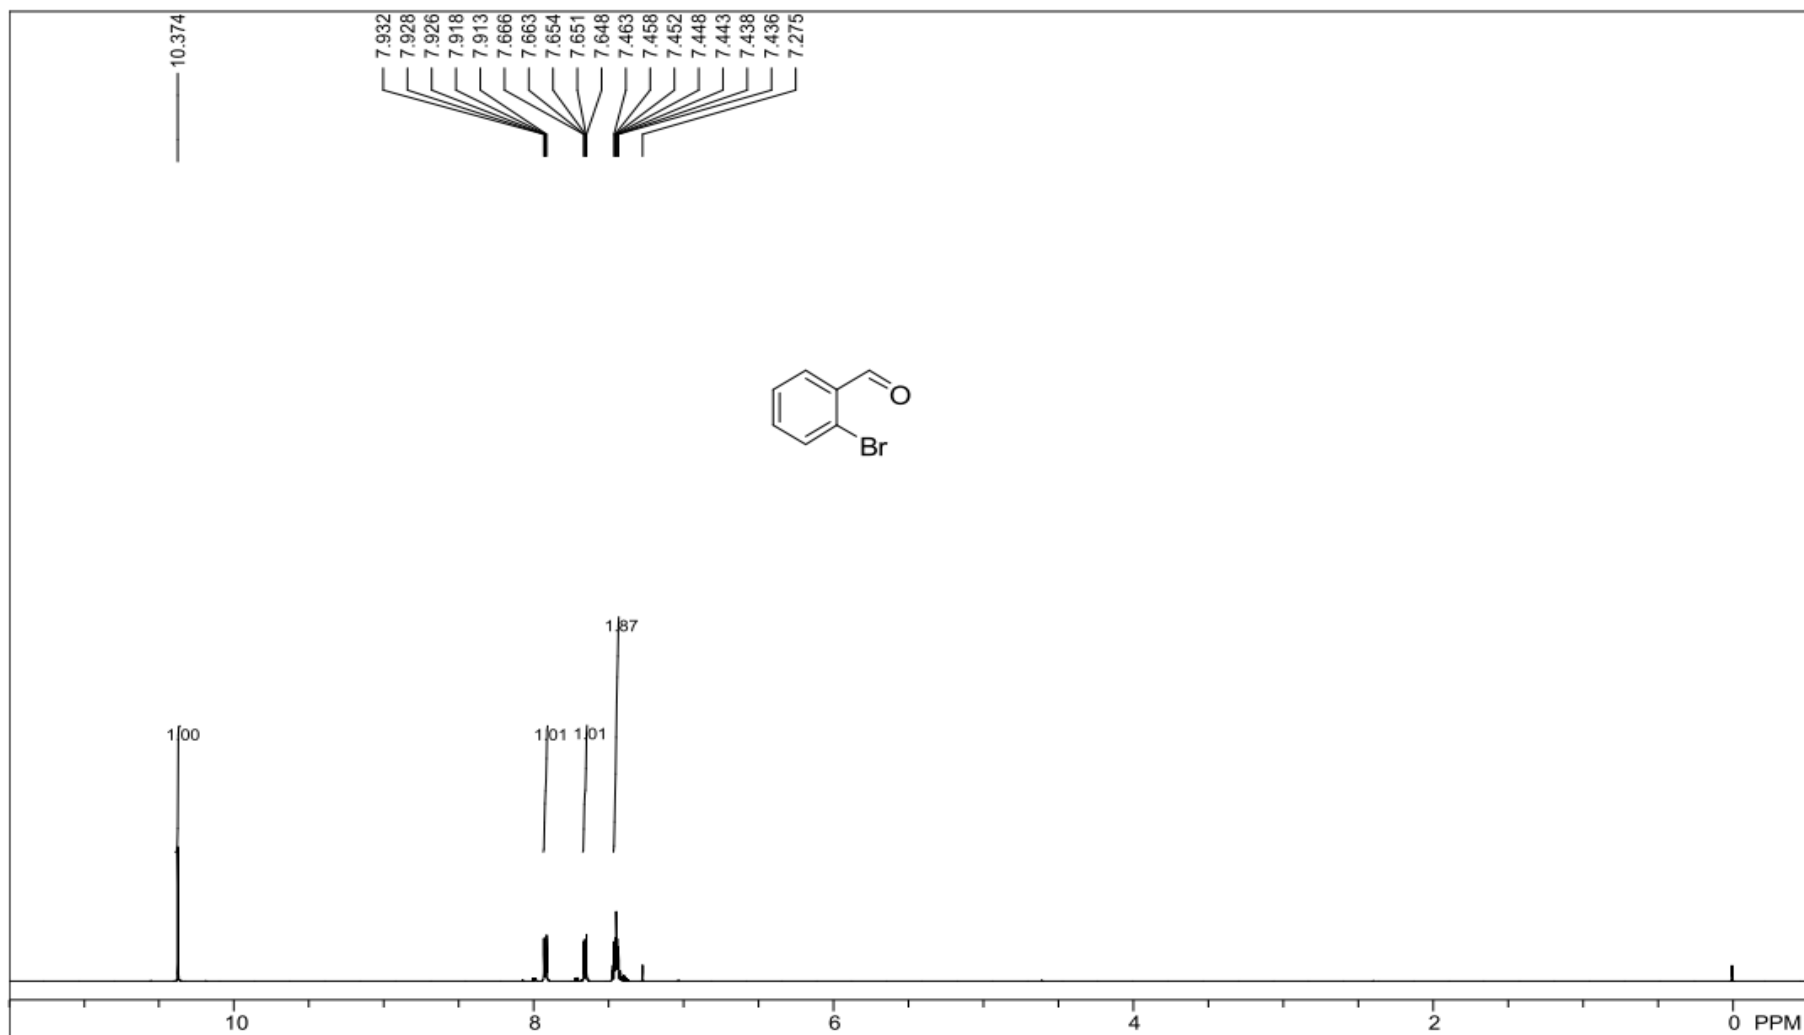

Figure 10.  $^1\text{H}$ NMR spectra of **2,4-Dichlorobenzaldehyde** (Table 2, entry 10).

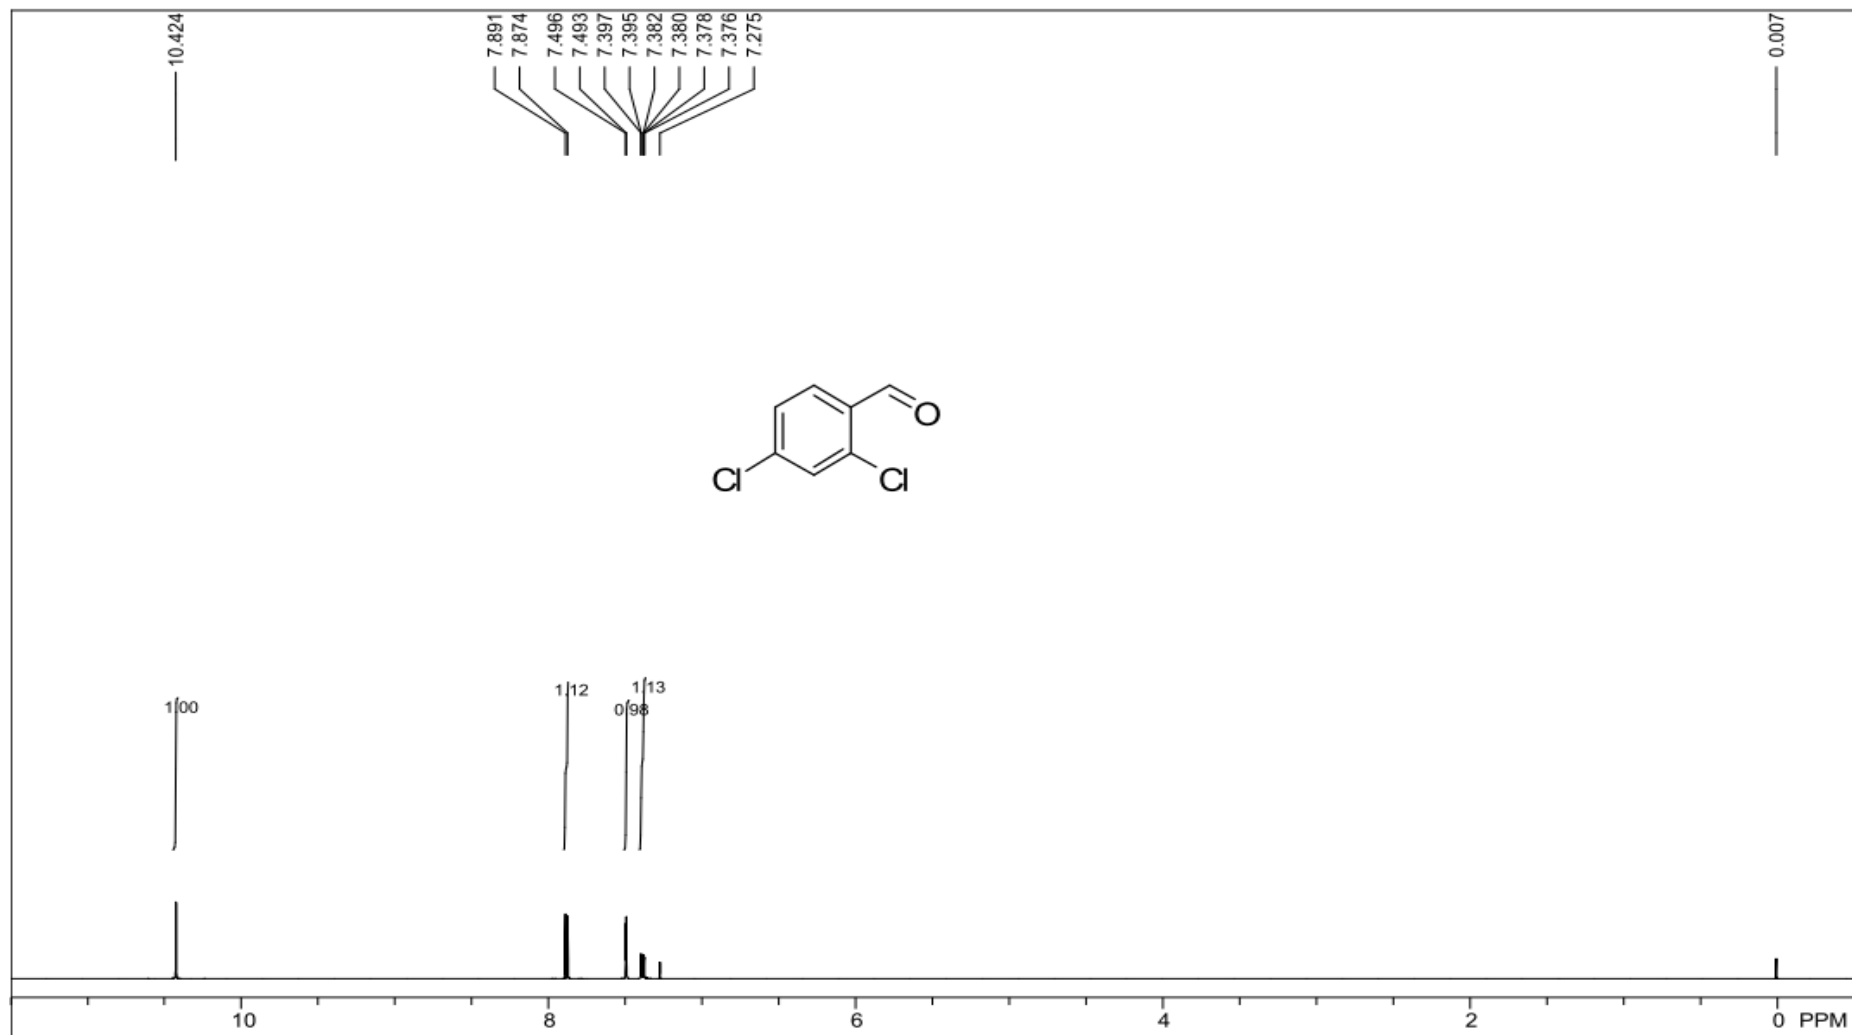

Figure 11. <sup>1</sup>H NMR spectra of **2-Chloro-6-fluorobenzaldehyde** (Table 2, entry 11).

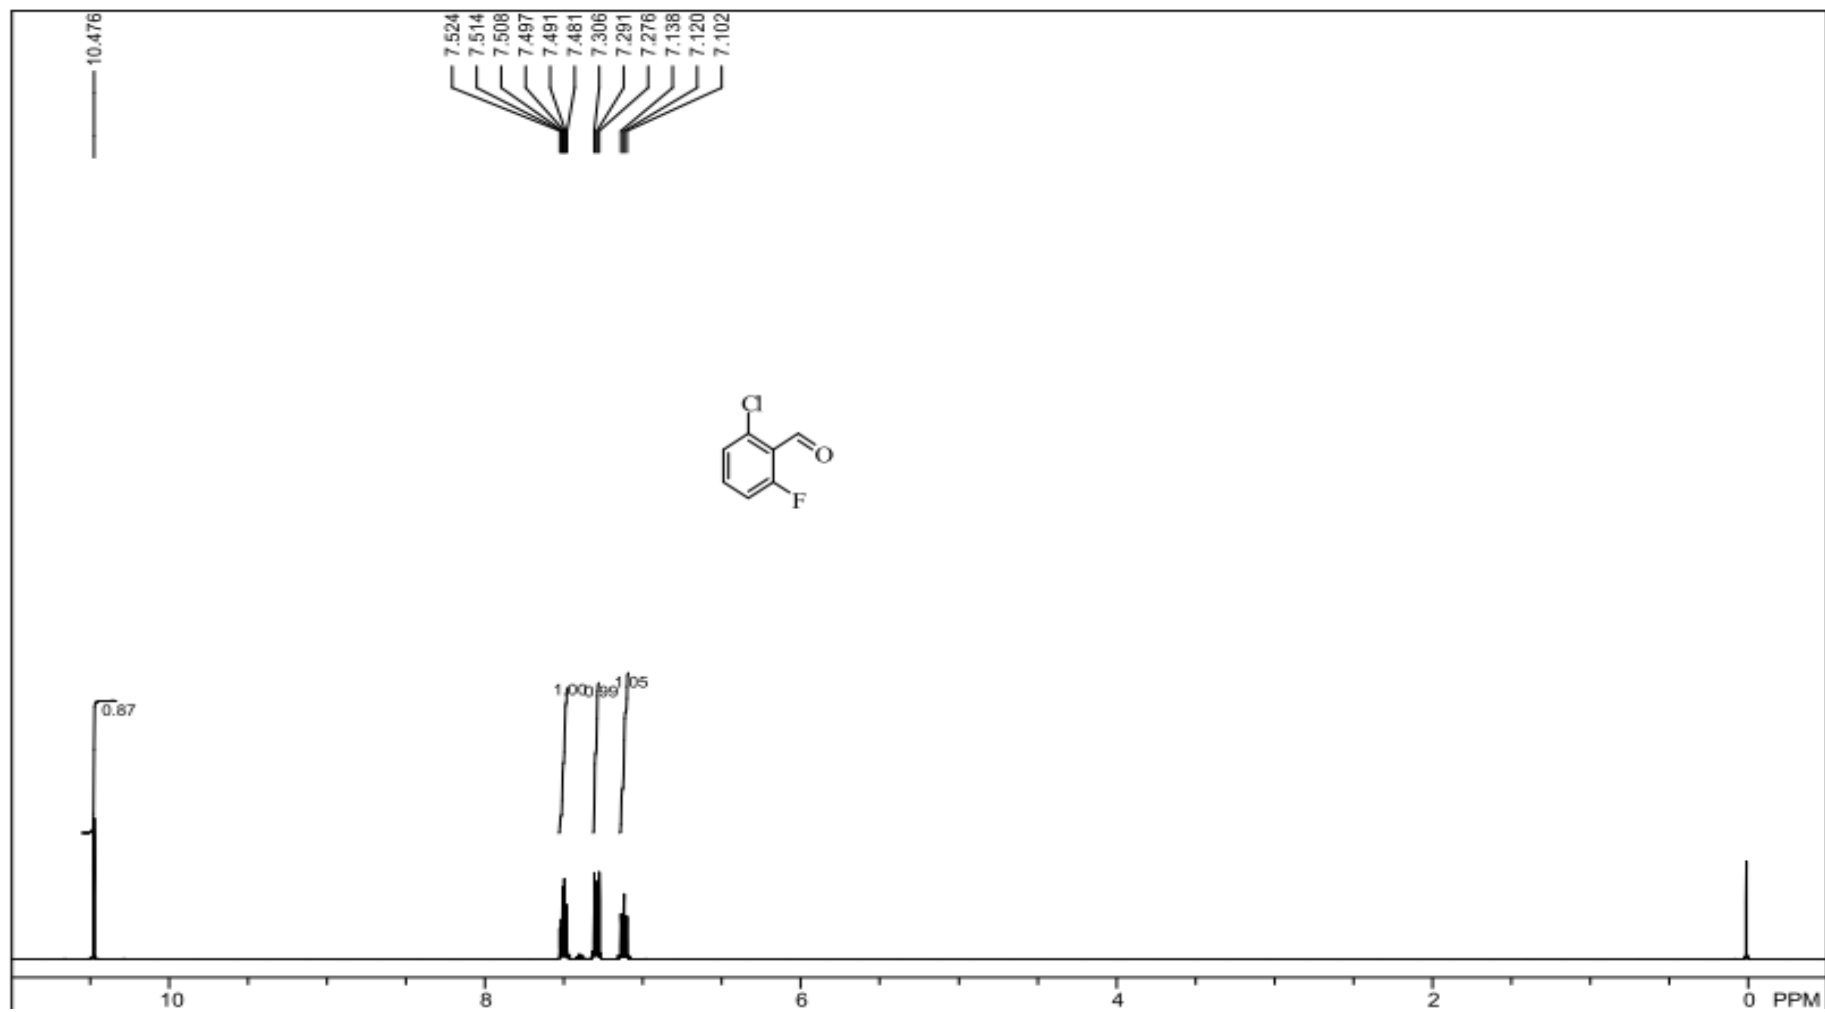

Figure 12. <sup>1</sup>H NMR spectra of **4-*iso*-Propylbenzaldehyde** (Table 2, entry 12).

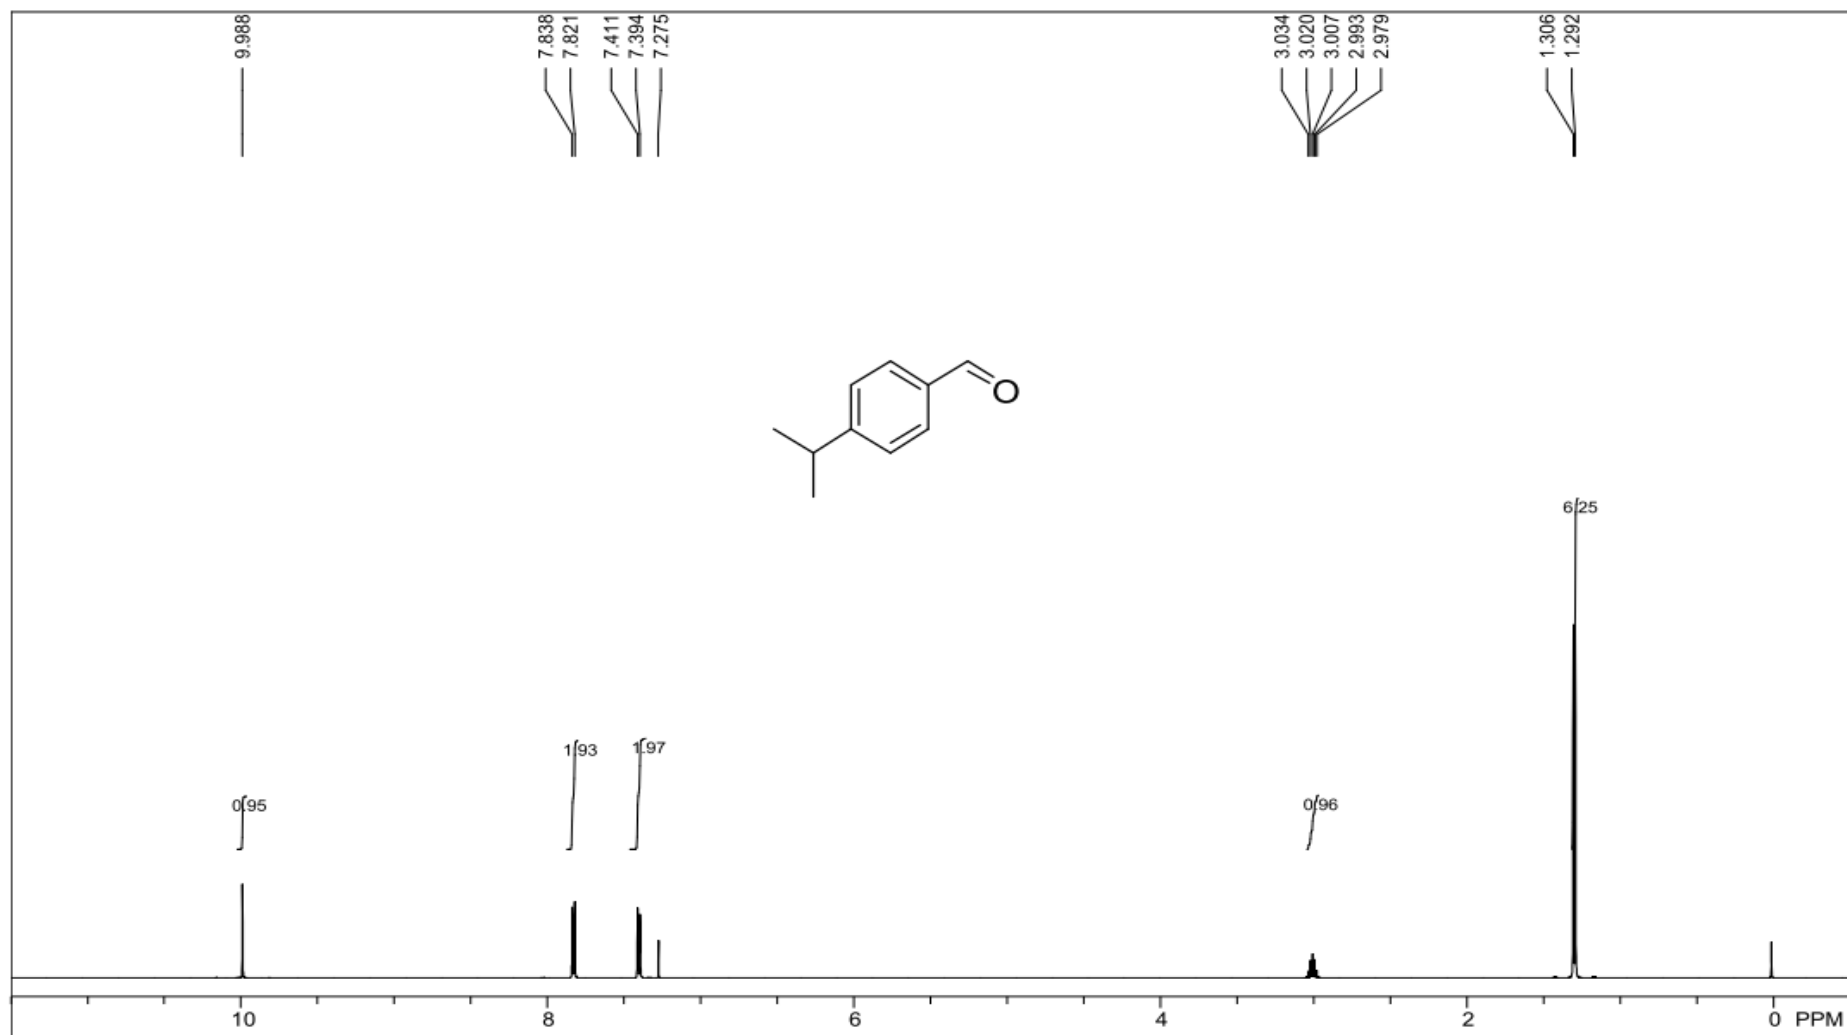

Figure 13.  $^1\text{H}$ NMR spectra of **4-*tert*-Butylbenzaldehyde** (Table 2, entry 13).

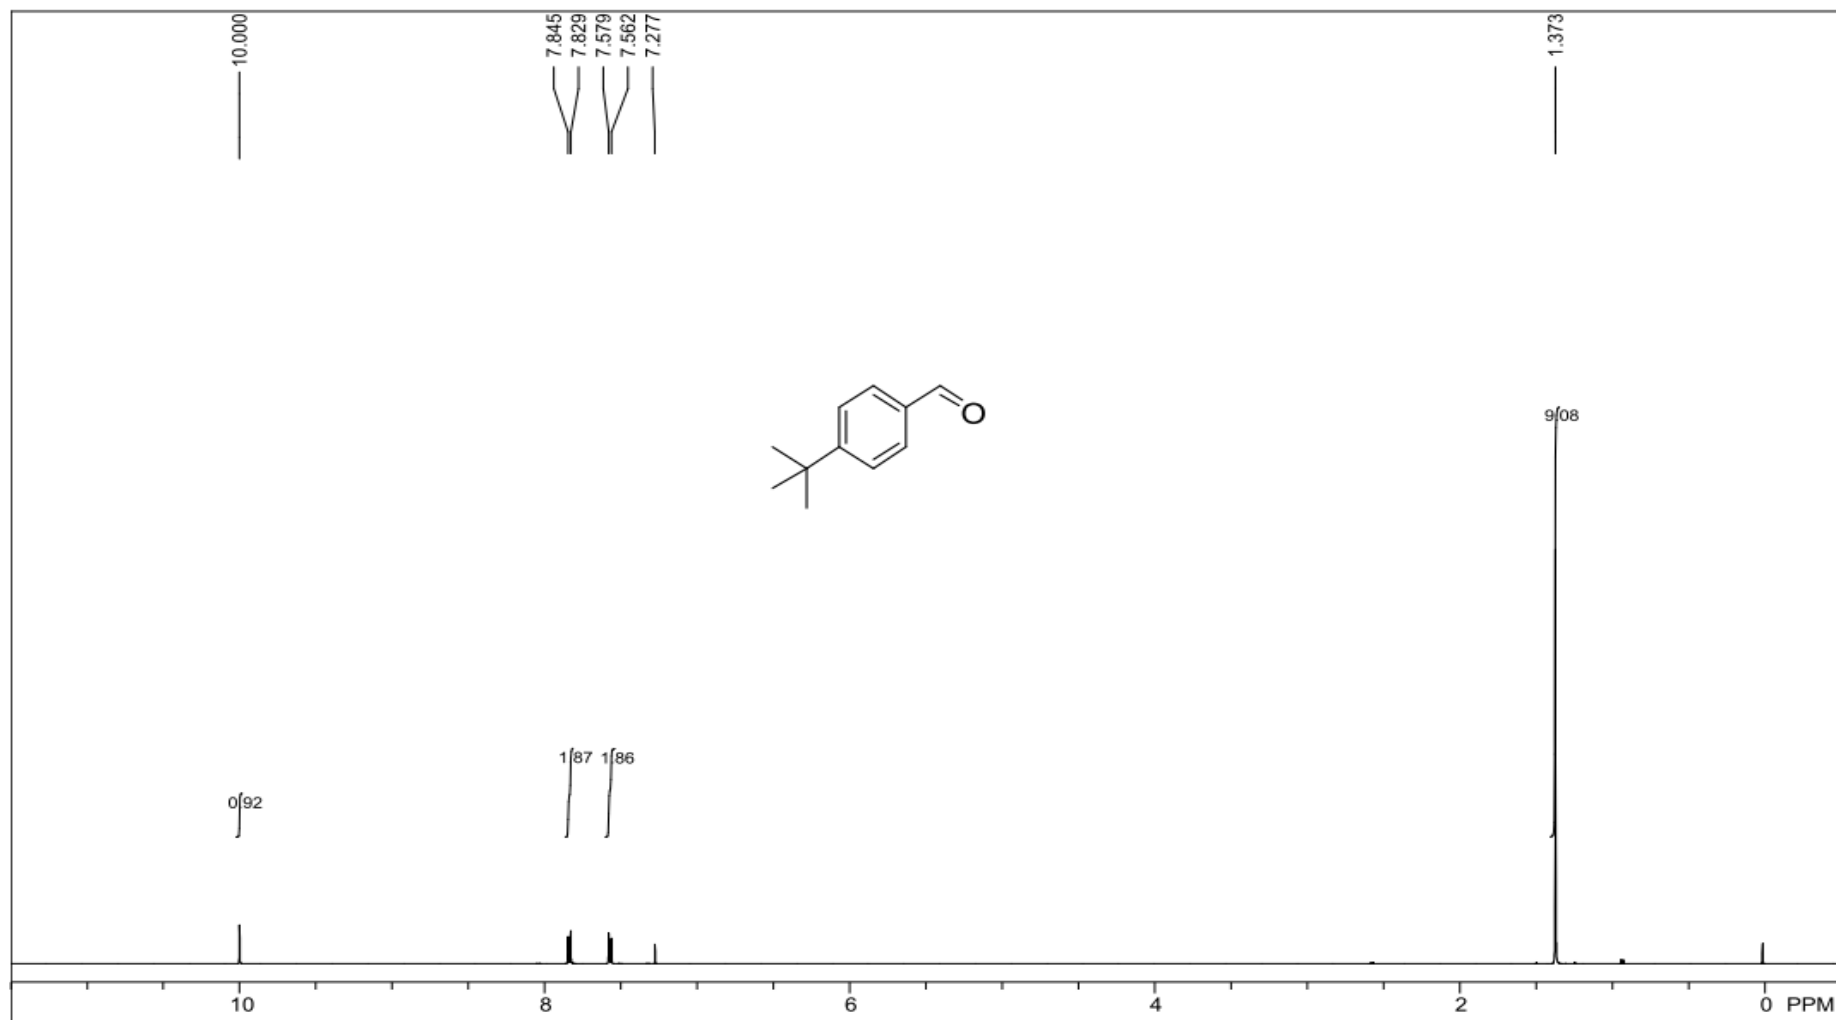

Figure 14.  $^1\text{H}$ NMR spectra of **4-Methylbenzaldehyde** (Table 2, entry 14).

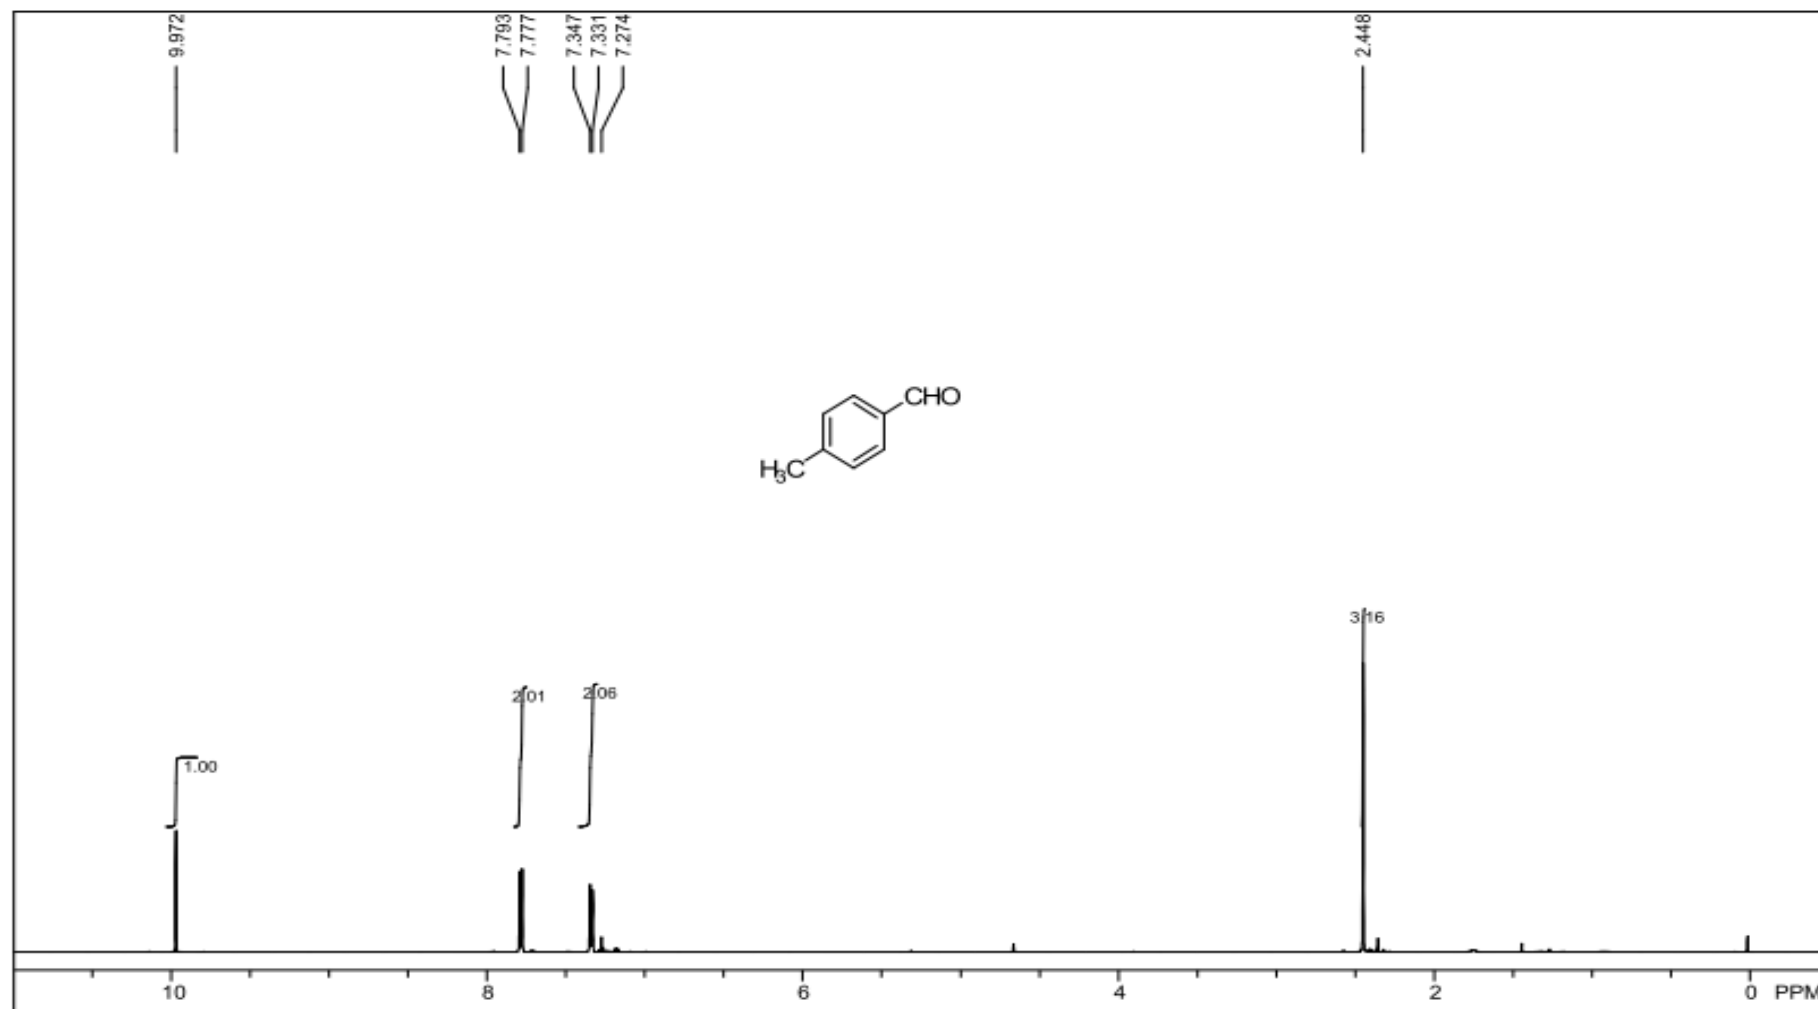

Figure 15. <sup>1</sup>H NMR spectra of **3,4-Dimethylbenzaldehyde** (Table 2, entry 15).

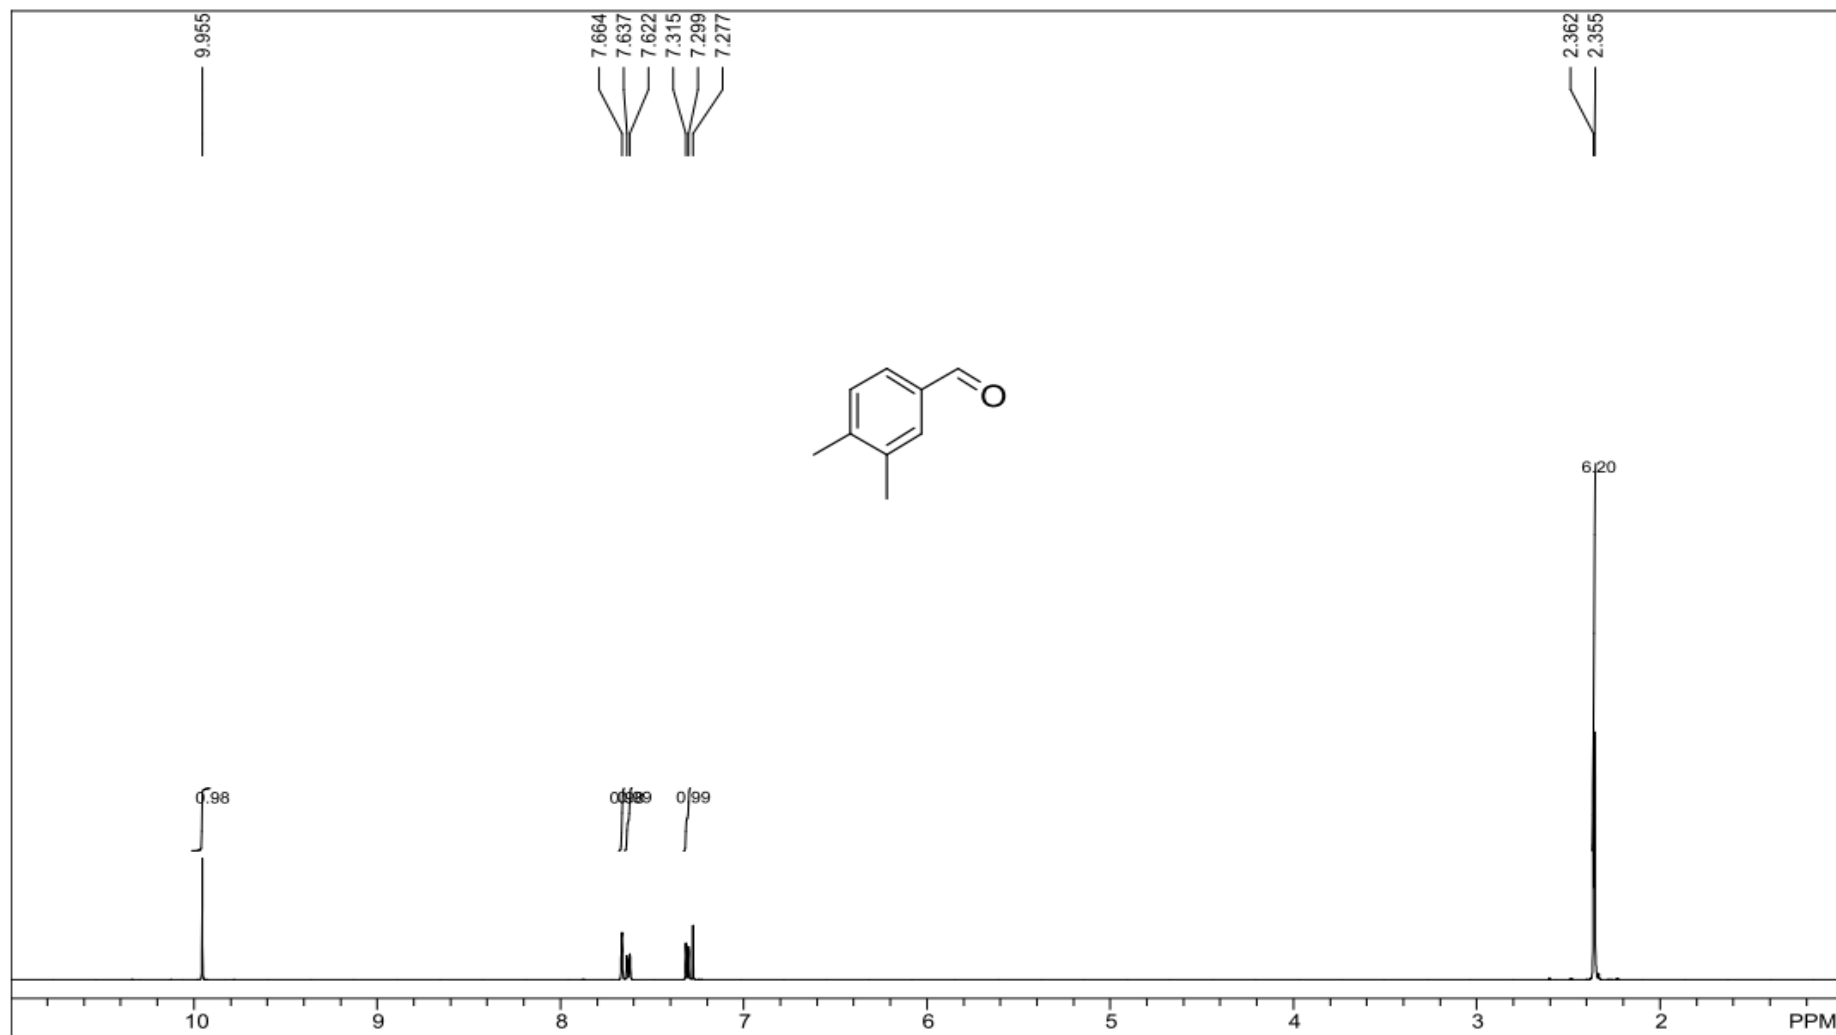



Figure 16. <sup>1</sup>H NMR spectra of **4-Chloroacetophenone** (Table 2, entry 16).

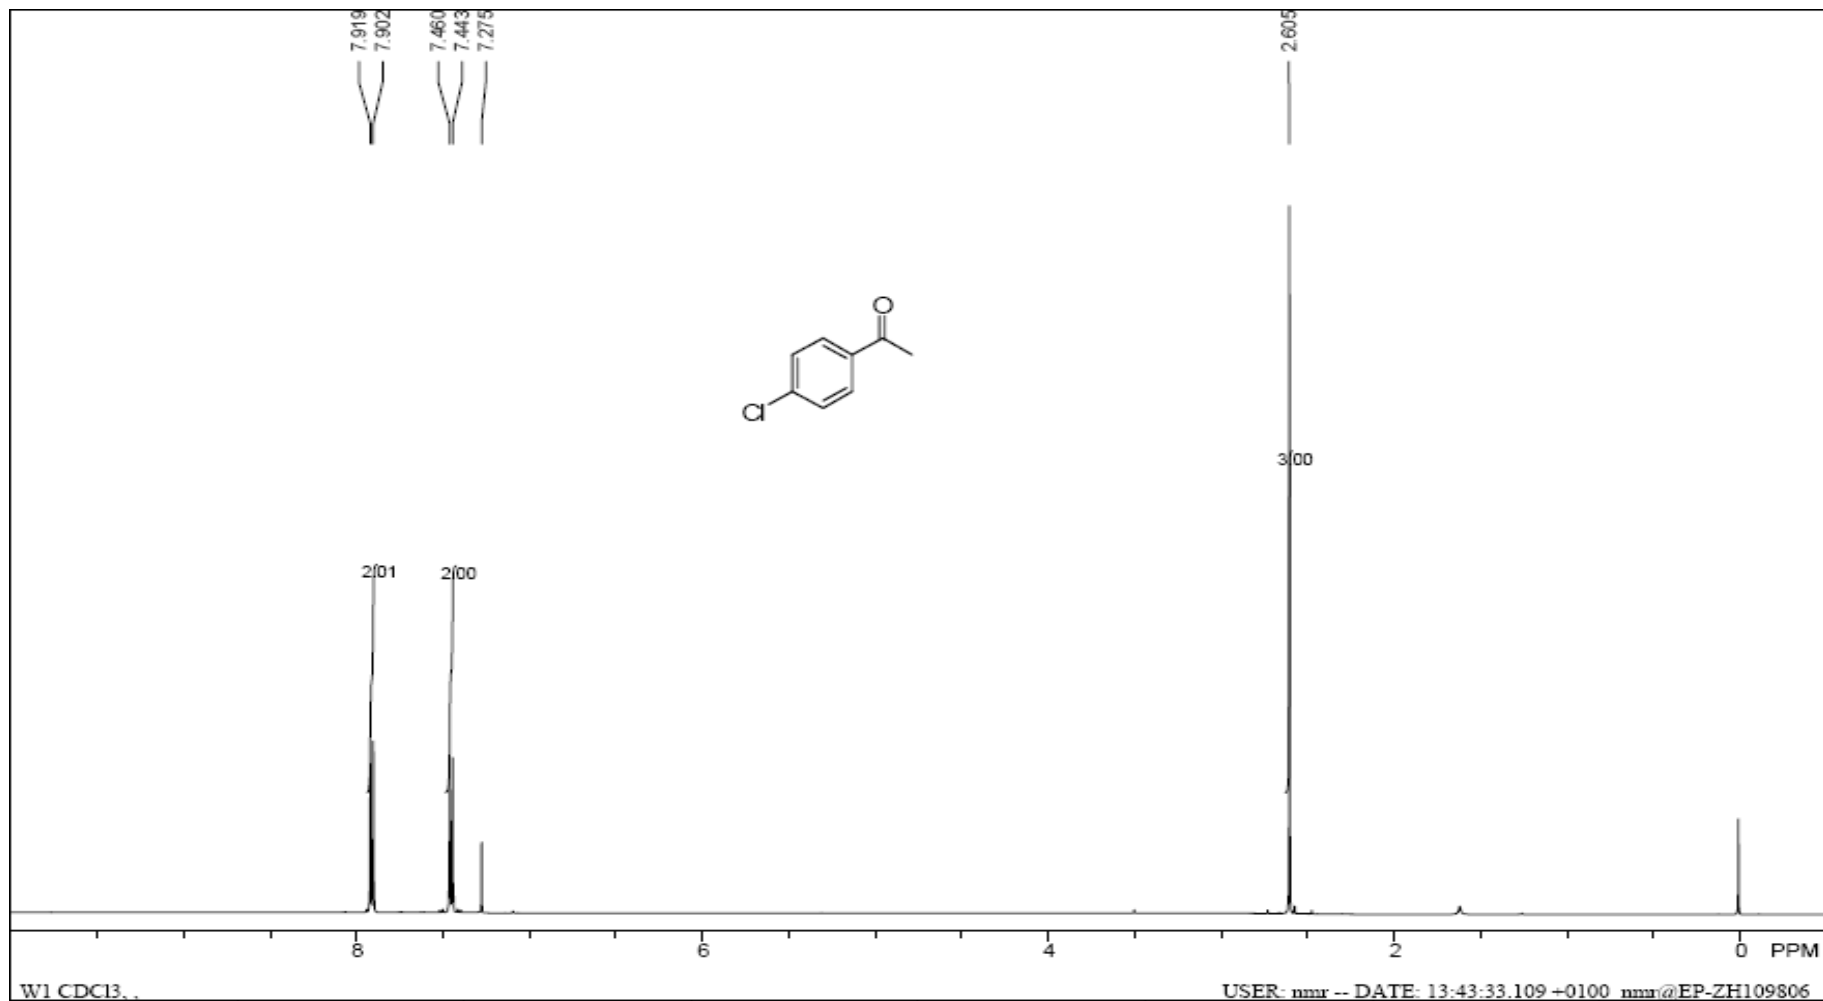

Figure 17.  $^1\text{H}$ NMR spectra of **Acetophenone** (Table 2, entry 17).

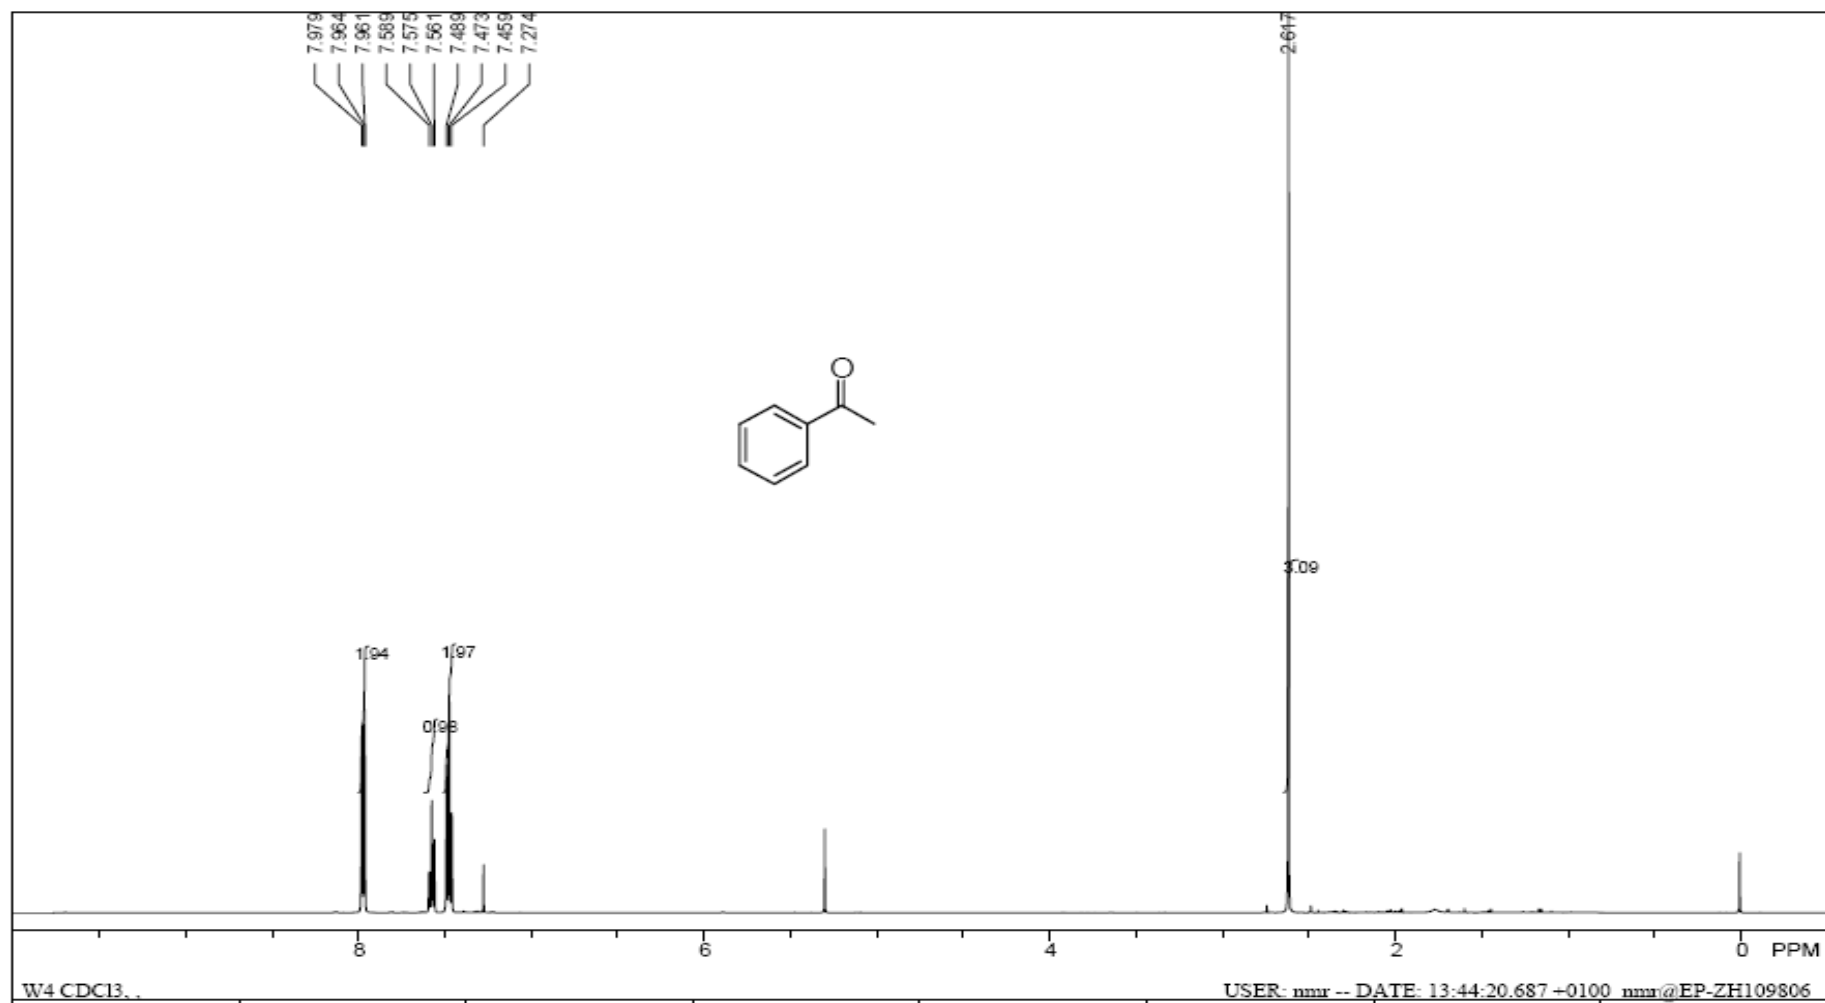

Supplement: c3ra45205k.pdf [file c3ra45205k.pdf]
